# Supplementary material for: Two-in-one template-assisted construction of hollow phosphide nanotubes for electrochemical energy storage
Source: Royal Society of Chemistry journal article supplement (doi:10.1039/d2qi00366j), 2022-01-01
Supplement: d2qi00366j1.pdf [file d2qi00366j1.pdf]

## Supporting Information

### **Two-in-one template-assisted construction of hollow phosphide nanotubes for electrochemical energy storage**

Leiyun Han <sup>a</sup>, Xilong Liu <sup>a</sup>, Zheng Cui <sup>a</sup>, Yang Chen <sup>a</sup>, Zijia Wang <sup>a</sup>, Yu Tang <sup>a</sup>, Yingjie Hua <sup>b\*</sup>, Chongtai Wang <sup>b</sup>, Haijiao Xie <sup>c</sup>, Xudong Zhao <sup>a\*</sup>, Xiaoyang Liu <sup>a, b\*</sup>

<sup>a</sup> State Key Laboratory of Inorganic Synthesis and Preparative Chemistry, College of Chemistry, Jilin University, Changchun, 130012, China

<sup>b</sup> Key Laboratory of Electrochemical Energy Storage and Energy Conversion of Hainan Province, School of Chemistry and Chemical Engineering, Hainan Normal University, Haikou, 571158, China

<sup>c</sup> Hangzhou Yanqu Information Technology Co., Ltd. Xixi Legu Creative Pioneering Park, Hangzhou, 310003, China

\* E-mail: liuxy@jlu.edu.cn (XY Liu); 521000hua282@sina.com (YJ Hua)

## Table of contents

|                                                                |    |
|----------------------------------------------------------------|----|
| Experimental section .....                                     | 2  |
| Chemicals .....                                                | 2  |
| Assembly of quasi-solid-state asymmetric supercapacitors ..... | 6  |
| Material characterization .....                                | 8  |
| Electrochemical measurements .....                             | 8  |
| Computational methods .....                                    | 21 |
| Table S1 .....                                                 | 32 |
| Table S2 .....                                                 | 33 |
| Table S3 .....                                                 | 34 |
| Table S4 .....                                                 | 35 |
| Table S5.....                                                  | 36 |
| Refences .....                                                 | 37 |

## **Experimental section**

### **Chemicals**

The chemical reagents used in the experiments were all analytically pure and not further purified. Ammonium molybdate tetrahydrate ( $(\text{NH}_4)_6\text{Mo}_7\text{O}_{24}\cdot 4\text{H}_2\text{O}$ ), Nitric acid ( $\text{HNO}_3$ , 65%), Hydrochloric acid ( $\text{HCl}$ , 38%), Nickel sulphate hexahydrate ( $\text{NiSO}_4\cdot 6\text{H}_2\text{O}$ ), Ferric chloride hexahydrate ( $\text{FeCl}_3\cdot 6\text{H}_2\text{O}$ ), Ammonium persulfate ( $(\text{NH}_4)_2\text{S}_2\text{O}_8$ ), Polyvinyl alcohol, and Potassium persulfate ( $\text{K}_2\text{S}_2\text{O}_8$ ) are purchased from Sinopharm Chemical Reagent Co., Ltd. Aniline solution ( $\text{C}_6\text{H}_7\text{N}$ ), Ammonia solution ( $\text{NH}_3\cdot \text{H}_2\text{O}$ ), and Sodium hypophosphite monohydrate ( $\text{NaH}_2\text{PO}_2\cdot \text{H}_2\text{O}$ ) were purchased from Shanghai Macklin Biochemical Co., Ltd.

### **Synthesis of $\text{MoO}_3$ nanorods**

$\text{MoO}_3$  nanorods was prepared according to previous works with slight modifications [S1]. The detailed process is as follows: 1.4 g of  $(\text{NH}_4)_6\text{Mo}_7\text{O}_{24}\cdot 4\text{H}_2\text{O}$  was stirred and sonicated in 6.66 mL of 65%  $\text{HNO}_3$  and 33.33 mL of deionized water. The mixture was then transferred into a 70 mL Teflon-lined stainless-steel autoclave and heated to  $180^\circ\text{C}$  at room temperature for 20 h. When the reaction was finished, the precipitate was collected by centrifugation and washed several times with deionized water and ethanol. Finally, the cleaned precipitate was dried in a vacuum oven at  $80^\circ\text{C}$  for 12 h.

### **Synthesis of PANI@ $\text{MoO}_3$ nanorods**

PANI@ $\text{MoO}_3$  nanorods were prepared by *in-situ* polymerization at room temperature. The process is as follows: the prepared 0.10 g  $\text{MoO}_3$  nanorods were added

to 10 mL of deionized water and stirred ultrasonically for 20 min for uniform dispersion. The dispersed milky white solution was added drop by drop to a 10 mL (0.1 mol L<sup>-1</sup>) HCl solution containing 0.30 mL of aniline monomer and stirred continuously for 20 min to allow complete dispersion. Subsequently, 10 mL (1.0 mol L<sup>-1</sup>) HCl solution containing 0.18 g (NH<sub>4</sub>)<sub>2</sub>S<sub>2</sub>O<sub>8</sub> was added dropwise to the aforementioned dispersion solution with continuous stirring and the pH was adjusted to 1-2 by adding HCl (1.0 mol L<sup>-1</sup>). With continuous stirring, the milky white dispersion gradually changed to a dark green solution, as displayed in **Figure S2(a-c)**. The reaction time was extended to 4 h after the solution turned dark green. After the reaction, the dark green precipitate was collected by centrifugation, and repeated with deionized water and ethanol. Finally, the precipitate was dried in a vacuum oven at 80°C for 12 h.

### **Synthesis of Ni(OH)<sub>2</sub>@PANI hollow nanotubes**

Ni(OH)<sub>2</sub>@PANI hollow nanotubes were prepared by CBD at room temperature. The process is as follows: the prepared PANI@MoO<sub>3</sub> nanorods 0.10 g were dispersed in 25 mL NiSO<sub>4</sub>·6H<sub>2</sub>O solution (1.0 mol L<sup>-1</sup>) and 20 mL K<sub>2</sub>S<sub>2</sub>O<sub>8</sub> solution (0.125 mol L<sup>-1</sup>) and sonicated for 20 min. After ultrasonic dispersion, 5 mL NH<sub>3</sub>·H<sub>2</sub>O was added under continuous stirring, and the reaction was continued for 2 h. After the reaction, the precipitated product was collected by centrifugation and washed several times with deionized water and ethanol. The treated precipitated product was dried in a vacuum oven at 80°C for 12 h, and the final powder sample was collected and denoted as Ni(OH)<sub>2</sub>@PANI-1M (1M indicates the concentration of 1.0 mol L<sup>-1</sup> of NiSO<sub>4</sub>·6H<sub>2</sub>O). Similarly, the amount of other reagents and reaction conditions remained unchanged,

and only the concentration of  $\text{NiSO}_4 \cdot 6\text{H}_2\text{O}$  was changed to 0.5 and 1.5 mol L<sup>-1</sup>, denoted as  $\text{Ni}(\text{OH})_2@\text{PANI-0.5M}$  and  $\text{Ni}(\text{OH})_2@\text{PANI-1.5M}$ , respectively.  $\text{Ni}(\text{OH})_2$  hollow nanotubes were prepared similarly, the  $\text{MoO}_3$  nanorods were used as templates and obtained without the addition of aniline solution in the preparation process. Finally, the preparation of PNAI hollow nanotubes was obtained by sonicating the prepared  $\text{PANI}@\text{MoO}_3$  nanorods in 20 mL of deionized water under continuous stirring, followed by the addition of 5 mL of ammonia solution for 2 h, without the addition of other reagents.

### **Synthesis of $\text{Ni}_2\text{P}@\text{PANI}$ hollow nanotubes**

The hollow  $\text{Ni}_2\text{P}@\text{PANI}$  nanotubes (denoted as PNP) were finally prepared by a low-temperature phosphorization reaction in a tube furnace under a nitrogen atmosphere. The process is as follows:  $\text{Ni}(\text{OH})_2@\text{PANI-1M}$  hollow nanotubes of 0.10 g were placed in a ceramic crucible with a cover at one end, and 0.22 g of  $\text{NaH}_2\text{PO}_2 \cdot \text{H}_2\text{O}$  was placed at the other end of the crucible and covered with a lid. Next, the end of the crucible containing  $\text{NaH}_2\text{PO}_2 \cdot \text{H}_2\text{O}$  was placed on the upstream side of the tube furnace. The sample was then heated to 300°C for 2 h at room temperature in the tube furnace with a gas collection device at a rate of 3°C/min under nitrogen protection (*notably, the low-temperature phosphorization reaction in this experiment should be covered with a lid in the ceramic crucible, otherwise the product cannot be obtained. Furthermore, the phosphorization process produces the toxic and explosive gas  $\text{PH}_3$ , which requires additional gas treatment and sealing devices to ensure safety during the experiment*). After the reaction was completed, the final product was

collected after cooling to room temperature and marked as PNP-2.2 (2.2 indicates a 2.2:1 mass ratio of phosphorus source to precursor material). Similarly, the amounts of other reagents and reaction conditions were maintained constant, and the mass ratios of phosphorus source and precursors were changed to 1.2:1 and 3.2:1 and marked as PNP-1.2 and PNP-3.2, respectively. Finally, the blank control Ni<sub>2</sub>P hollow nanotubes were prepared in the similar manner as the aforementioned Ni(OH)<sub>2</sub> hollow nanotubes as precursors, and the products were obtained under the same conditions of phosphatization.

### **Synthesis of PANI derived nitrogen-doped carbon nanotubes**

PANI derived nitrogen-doped carbon nanotubes (denoted as PNCT) were prepared by removing the MoO<sub>3</sub> template from the PANI@MoO<sub>3</sub> nanorods obtained by *in-situ* polymerization at room temperature as described previously, followed by a high-temperature carbonization reaction in the tube furnace under nitrogen protection. The specific process is as follows: the prepared PANI@MoO<sub>3</sub> nanorods 1.0 g were ultrasonically dispersed in 60 mL of deionized water containing 20 mL of NH<sub>3</sub>·H<sub>2</sub>O and the reaction was continuously stirred for 1 h to remove MoO<sub>3</sub>. The precipitate was collected by centrifugation and washed several times with deionized water and ethanol, followed by drying at 80°C for 12 h in a vacuum oven. Finally, an amount of the dried sample was placed in a ceramic crucible in the tube furnace under nitrogen protection at a rate of 2°C/min at room temperature to 600°C for 2 h. At the end of the reaction, the samples were finally collected.

### **Synthesis of Fe<sub>2</sub>O<sub>3</sub> modified PANI-derived nitrogen-doped carbon nanotubes**

The PNCT obtained from the above preparation was used as a precursor to prepare Fe<sub>2</sub>O<sub>3</sub> modified PANI derived nitrogen-doped carbon nanotubes (denoted as Fe<sub>2</sub>O<sub>3</sub>@PNCT) through hydrothermal and subsequent calcination treatment processes. The process is as follows: 0.135 g of FeCl<sub>3</sub>·6H<sub>2</sub>O and 0.07 g of Na<sub>2</sub>SO<sub>4</sub> were ultrasonically dissolved in 50 mL of deionized water with continuous stirring to form a homogeneous solution. Next, 0.015 g of PNCT was added to this mixture and stirred continuously for 20 min to obtain a well-dispersed black suspension. The suspension was then transferred to a 100 mL Teflon-lined stainless-steel autoclave and heated to 160°C at room temperature for 6 h. After the reaction, the sample was washed several times by centrifugation with deionized water and ethanol, and the sample was dried in a vacuum oven at 80°C for 12 h. Finally, several dried samples were placed in a ceramic crucible protected by nitrogen in a tube furnace at a rate of 3°C/min at room temperature to 400°C for 2 h. After the reaction, the brownish red powder samples were collected.

#### **Assembly of quasi-solid-state asymmetric supercapacitors**

To demonstrate the electrochemical performance and practical applications of the samples, a quasi-solid state asymmetric supercapacitor was assembled using Ni<sub>2</sub>P@PANI hollow nanotubes as the positive electrode, Fe<sub>2</sub>O<sub>3</sub>@PNCT as the negative electrode, and PVA/KOH gel as the electrolyte. In particular, the preparation of PVA/KOH gel was prepared according to a previous report with slight modifications [2, 25]. The specific process is as follows: 2 g of polyvinyl alcohol (PVA) was dissolved in 40 mL of deionized water and stirred at 130°C until PVA was completely dissolved to form a clear and transparent solution. The solution was cooled to room temperature

with continuous stirring. Next, 10 mL of deionized water containing 2 g of KOH was slowly added to the PVA solution with continuous stirring to form the PVA/KOH gel electrolyte. Subsequently, the positive and negative electrodes were immersed into the PVA/KOH gel for 5 min, and the immersion was repeated three times so that the positive and negative electrode materials were completely coated with gel. Finally, a quasi-solid asymmetric supercapacitor with a sandwich (positive electrode/gel electrolyte/negative electrode) structure can be assembled. In asymmetric SCs, the two electrodes exhibit specific capacitances, masses and potential windows. In order to construct asymmetric SCs, a charge balance relationship,  $Q^+ = Q^-$ , should be followed between the positive and negative electrodes, where the charge stored by the positive and negative electrodes depends on the specific capacity ( $C$ ), the potential range of the discharge process ( $\Delta V$ ) and the mass of the electrodes ( $m$ ), following the below equation [24, 48]:

$$Q^+ = Q^- \quad \#(1)$$

$$Q = C \times \Delta V \times m \quad \#(2)$$

$$C^+ \times \Delta V^+ \times m^+ = C^- \times \Delta V^- \times m^- \quad \#(3)$$

Thus, calculations based on GCD curves at  $2 \text{ A g}^{-1}$  showed that the  $\text{Ni}_2\text{P@PANI}$  electrode specific capacity was about  $892 \text{ C g}^{-1}$  (**Figure 3(c)**), and the specific capacity of  $\text{Fe}_2\text{O}_3\text{@PNCT}$  was  $328 \text{ C g}^{-1}$  (the potential window is  $1.0 \text{ V}$ , equivalent to  $328 \text{ F g}^{-1}$ ,  $91 \text{ mA h g}^{-1}$ , in **Figure S23(c)** at  $2 \text{ A g}^{-1}$ ). In this work, the loading mass of active materials was  $3.5 \pm 0.5 \text{ mg}$  for  $\text{Ni}_2\text{P@PANI-2.2}$  (more details about the mass loading of active material see **Table S4**). From this, it can



be calculated that the load ratio of the positive and negative electrode was approximately 0.61, then the negative electrode Fe<sub>2</sub>O<sub>3</sub>@PNCT mass loading range was about 6.0 mg and the whole device mass loading was about 10.0 mg.

### **Material characterization**

The morphologies and structures of the samples were characterized by scanning electron microscopy (FE-SEM, JEOL JSM 6700F) and transmission electron microscopy (FEI Tecnai G2 S-Twin F20 D573). The crystal structure of the materials was analyzed by X-ray diffraction (XRD, D/max 2550V/PC, CuK $\alpha$  radiation), and surface elemental analysis. Oxidation states were characterized by X-ray photoelectron spectroscopy (XPS, ESCALAB 250, Mg K $\alpha$  radiation) and energy dispersive X-ray spectroscopy (EDS, FEI Helios Nanolab 600i), and the specific surface area and pore size distribution results were obtained by specific surface area analyzer (ASAP 2420). The functional groups of the samples were characterized by Fourier transform infrared spectroscopy (Bruker FTIR IFS-66V/S, and pure KBr for spectral backgrounds). The samples were prepared by grinding the resulting powder and KBr in a mortar at a mass ratio of 1:10, followed by pressing at 10 MPa at room temperature to obtain the test samples. Raman spectroscopy was measured in air on a confocal Raman microscope (RM 1000, Renishaw) using a 532 nm laser. All spectral peaks were calibrated against the value of 520.7 cm<sup>-1</sup> of a silicon wafer.

### **Electrochemical measurements**

Electrochemical measurements were performed on an electrochemical

workstation (CHI760e, CH Instruments Inc., Shanghai) in 2.0 mol L<sup>-1</sup> KOH. A standard three-electrode system was used, with Ni<sub>2</sub>P@PANI or Fe<sub>2</sub>O<sub>3</sub>@PNCT as the working electrode, Pt foil as the counter electrode, Hg/HgO electrode as the reference electrode. The asymmetric device was investigated using a two-electrode testing cell. The Fe<sub>2</sub>O<sub>3</sub>@PNCT negative was prepared by grinding a mixture of active material, acetylene black, and PTFE in a mass ratio of 8:1:1, and pressed onto a nickel foam (2 cm × 2 cm) under 3.0 MPa (the positive electrode was prepared in the same way). The average mass loading of Fe<sub>2</sub>O<sub>3</sub>@PNCT was 4.0 ± 0.5 mg (more details about the mass loading of active material see **Table S4**). Cyclic voltammetry (CV) curves were performed at different scan rates in the potential range of 0.0-0.7 V and -1.0-0.0 V. Galvanostatic charge/discharge (GCD) curves were performed at different current densities in the voltage range 0.0-0.6 V and -1.0-0.0 V. Electrochemical impedance spectroscopy (EIS) was performed at an AC voltage of 5.0 mV amplitude applied in the frequency range 0.01-100 kHz.

The mass specific capacity ( $C_m$ ), area specific capacity ( $C_s$ ), energy density ( $E$ ), and power density ( $P$ ) of the electrodes and devices are calculated by the following equations [3, 48]:

$$C_{m(Cg^{-1})} = \frac{i \times \Delta t}{m} \#(4)$$

$$C_{m(Ahg^{-1})} = \frac{i \times \Delta t}{3600 \times m} \#(5)$$

$$E = \frac{1}{2} \times C \times \Delta V^2 \#(6)$$

$$P = \frac{E}{\Delta t} \#(7)$$

where  $C_m$  (C g<sup>-1</sup>) is the mass specific capacity,  $i$  (A) is the charge/discharge current,  $\Delta t$  (s) is the discharge time,  $\Delta V$  (V) is the discharge potential window, and  $m$  (g) is the electrode active mass loading.

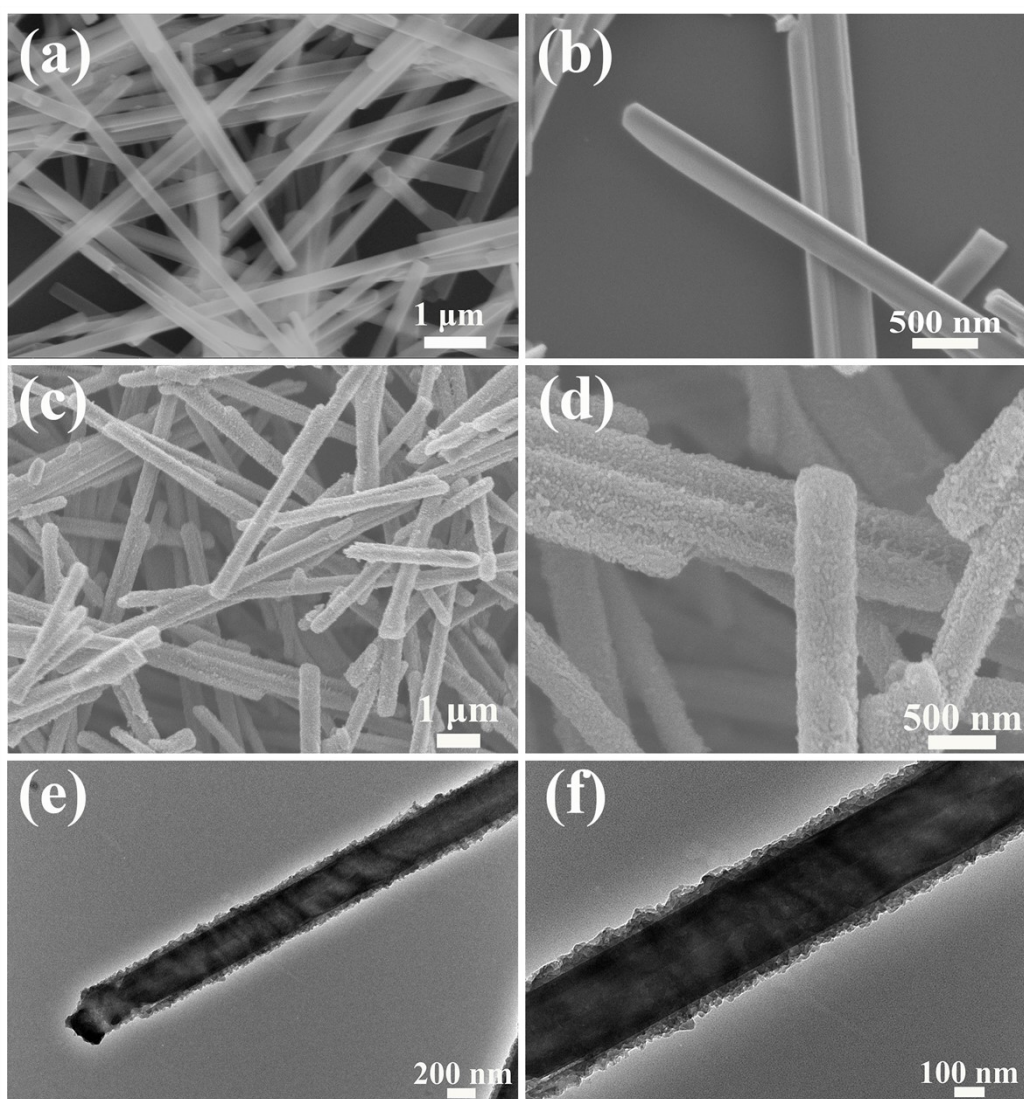

**Figure S1:** (a, b) SEM images of the MoO<sub>3</sub> template, (c, d) PANI @ MoO<sub>3</sub>, and (e, f) the TEM of PANI @ MoO<sub>3</sub>.

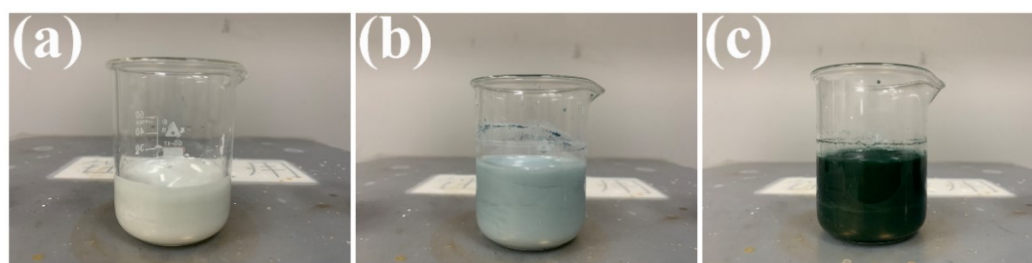

**Figure S2:** Digital photo image of PANI@MoO<sub>3</sub> sample: (a) 0 minute, (b) 30 minutes, and (c) 4 hours.

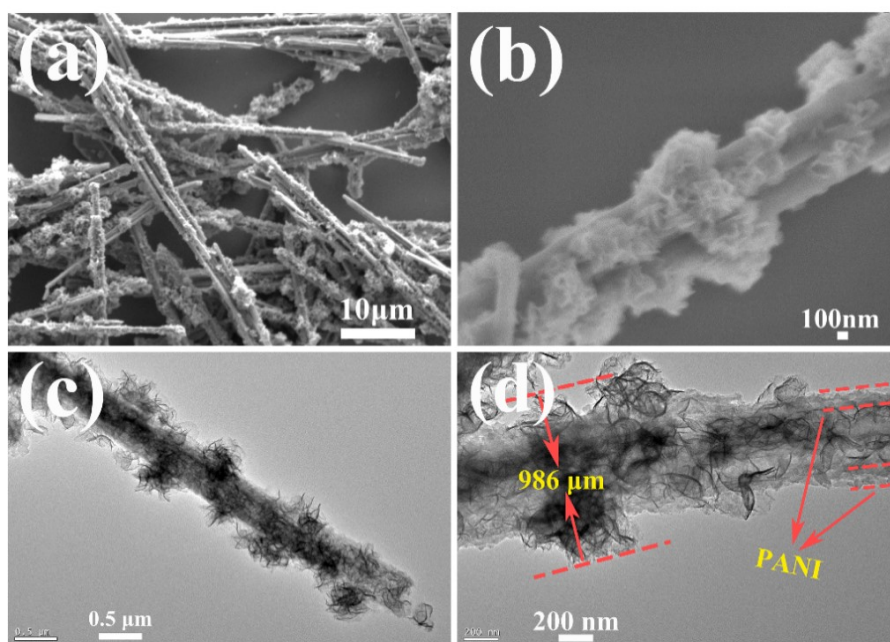

**Figure S3:** SEM and TEM images of the Ni(OH)<sub>2</sub>@PANI hollow nanotubes obtained via the CBD reactions under 0.5 mol L<sup>-1</sup> NiSO<sub>4</sub>

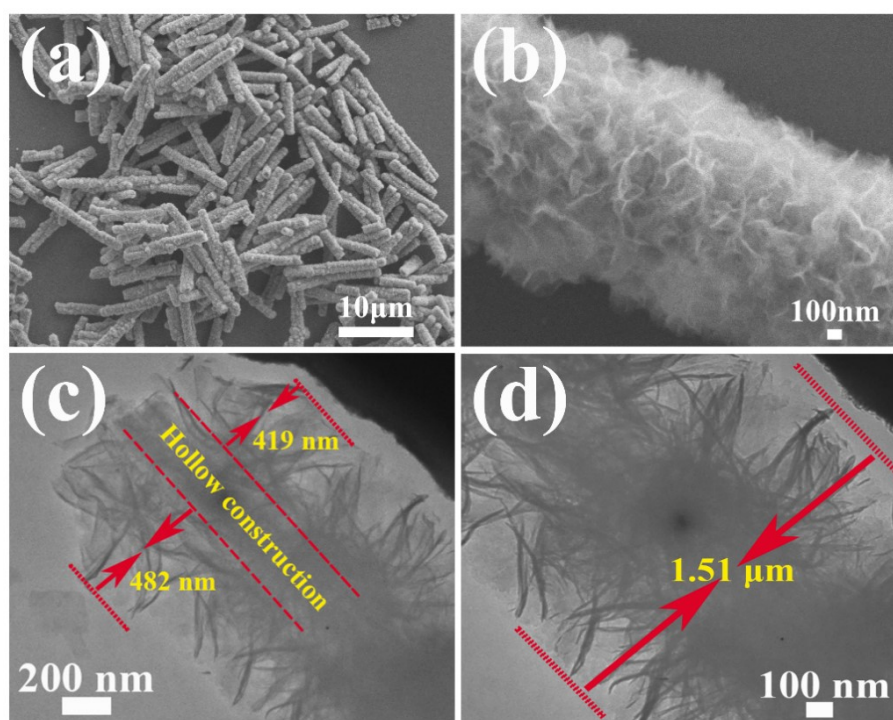

**Figure S4:** SEM and TEM images of the Ni(OH)<sub>2</sub>@PANI hollow nanotubes obtained via the CBD reactions under 1.0 mol L<sup>-1</sup> NiSO<sub>4</sub>

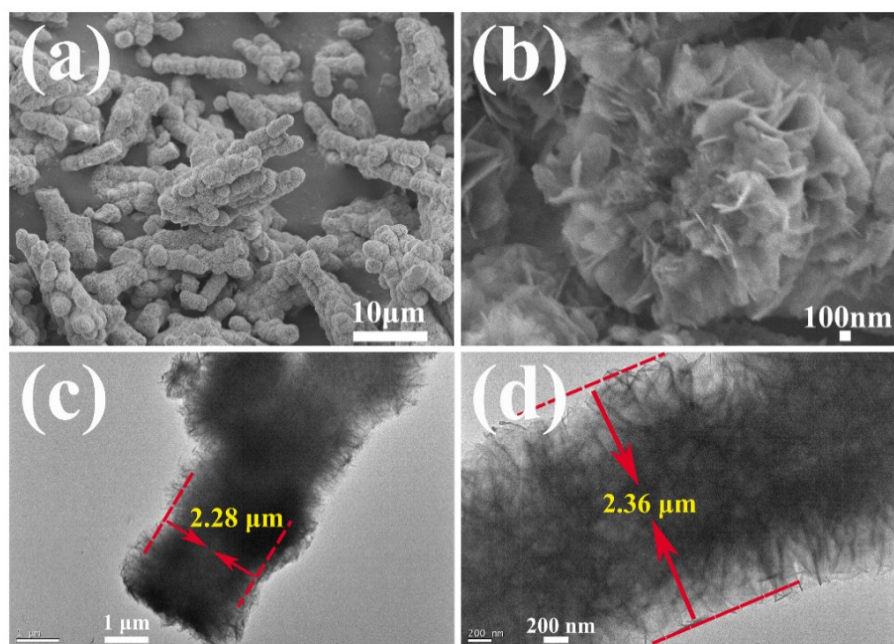

**Figure S5:** SEM and TEM images of the Ni(OH)<sub>2</sub>@PANI hollow nanotubes obtained via the CBD reactions under 1.5 mol L<sup>-1</sup> NiSO<sub>4</sub>

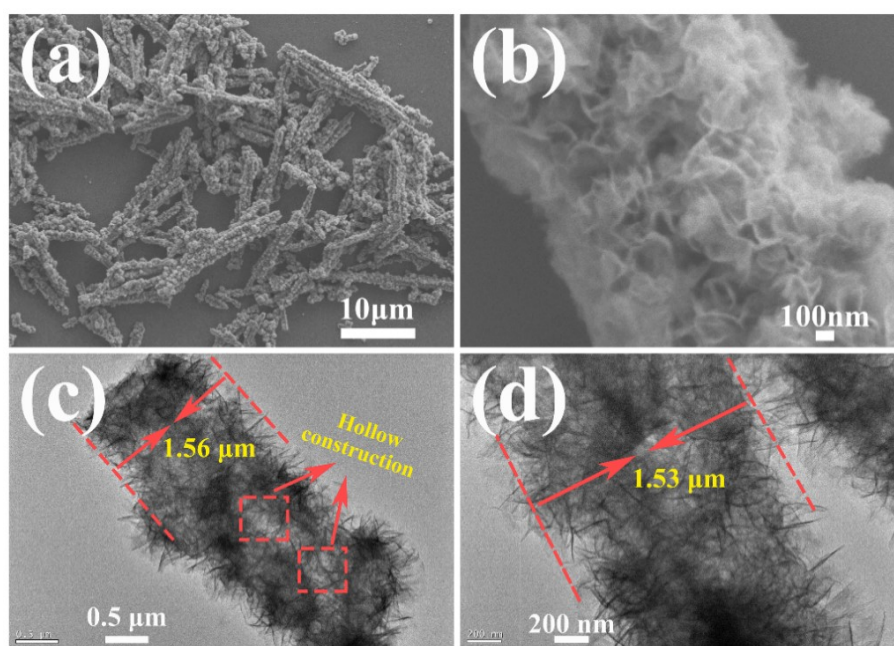

**Figure S6:** SEM and TEM images of the blank Ni(OH)<sub>2</sub> hollow nanotubes obtained via the CBD reactions under 1.0 mol L<sup>-1</sup> NiSO<sub>4</sub> without PANI layer.

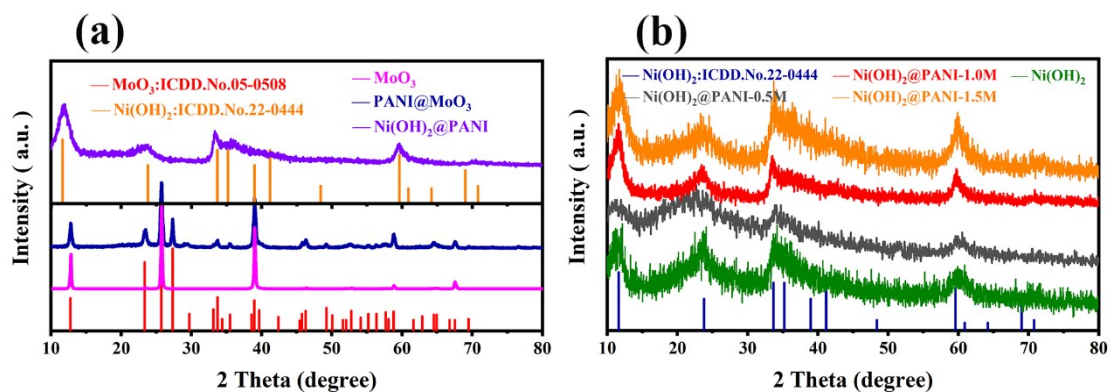

**Figure S7:** (a) XRD patterns of the MoO<sub>3</sub>, PANI@MoO<sub>3</sub>, and Ni(OH)<sub>2</sub>@PANI precursors, (b) XRD patterns of the Ni(OH)<sub>2</sub>@PANI-x precursors obtained via the CBD reactions at different NiSO<sub>4</sub> concentrations

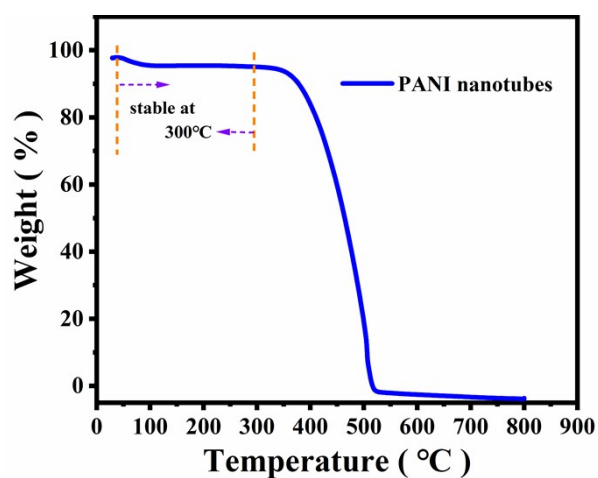

**Figure S8:** The TGA curves of PANI hollow nanotubes obtained through the removal of MoO<sub>3</sub> template.

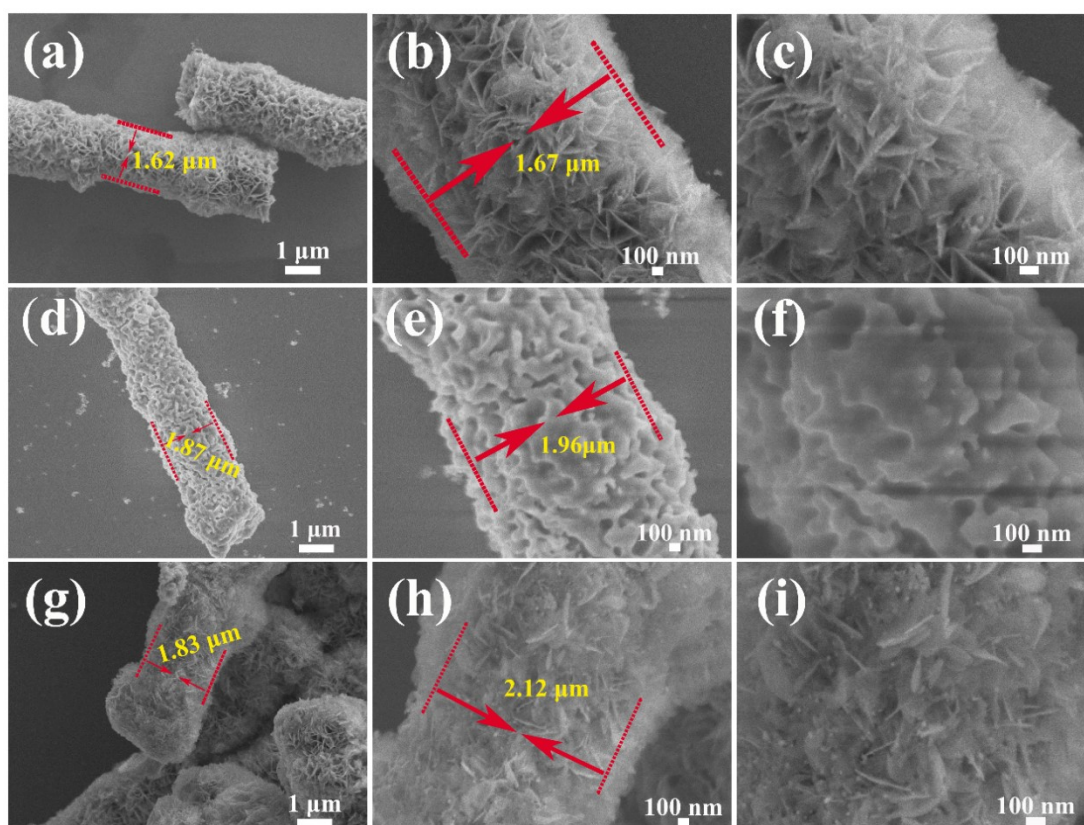

**Figure S9:** Morphological characterization of different ratios of phosphate samples and the blank samples: (a-c) SEM images of the Ni<sub>2</sub>P@PANI-1.2 hollow nanotubes, (d-f) SEM images of the Ni<sub>2</sub>P@PANI-3.2 hollow nanotubes, and (g-i) SEM images of the blank Ni<sub>2</sub>P hollow nanotubes samples.

At a lower phosphorization ratio of 1.2:1, **Figure S9(a, b)**, due to the low phosphating mass ratio, the reaction rate was slower and thus beneficial to maintain the whole morphological stability, the sample still retained the morphology of the precursor without structural damage. In the high magnification SEM images in **Figure S9(c)**, the smooth surface of Ni(OH)<sub>2</sub> nanosheets in PNP-1.2 was transformed into a 'spot-like' particle shape and became rough overall. When the mass ratio was further increased to 3.2:1, as



shown in **Figure S9(d-f)**. The phosphatization at a high mass ratio no longer has uniformly dispersed rough porous nanosheets although the highly ordered nanotube morphology of the precursor was still retained. The excessive reaction destroyed the porous and interconnected Ni<sub>2</sub>P sheets, causing the sheets to accumulate on the surface of PANI nanotubes and form a bulk, which no longer has a perfect morphology. For the blank Ni<sub>2</sub>P sample, when the phosphatization was carried out with a mass ratio of 2.2:1, the morphology was shown in **Figure S9(g-i)**, and the surface of the nanosheets still formed a rough particle-like morphology with uniform dispersion. Since it did not contain the stable support of PANI nanotubes, the large-scale collapse and fragmentation of the nanosheets with poor morphological retention can be seen in the high magnification images in **Figure S9(h, i)** after the phosphatization process.

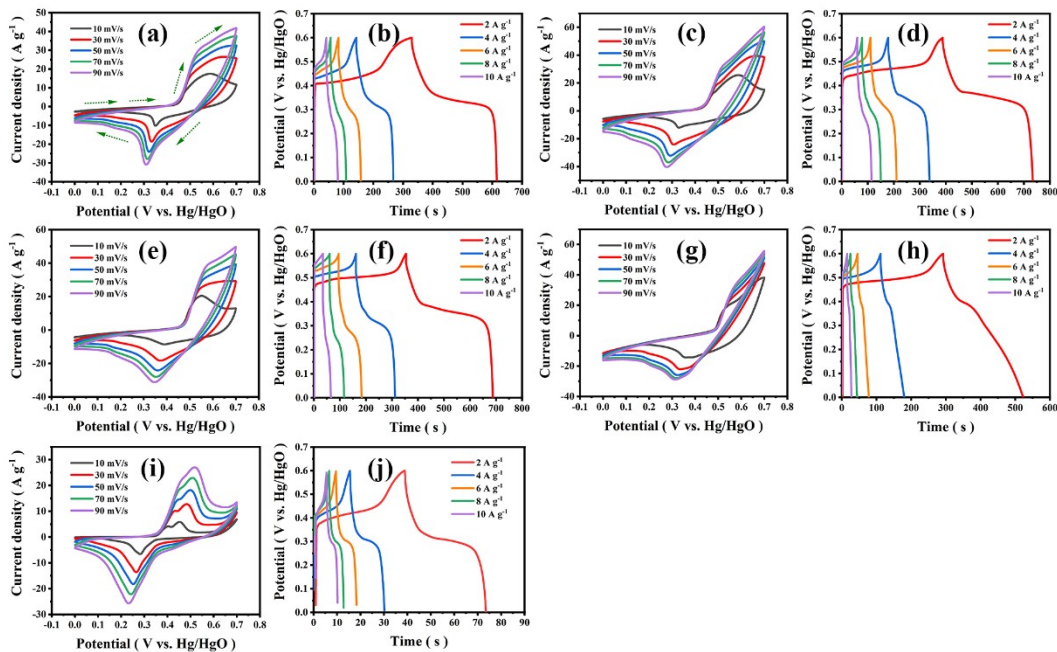

**Figure S10 :** Electrochemical characterization of the CV and GCD curves of Ni(OH)<sub>2</sub>@PANI-x and blank samples prepared at different NiSO<sub>4</sub> concentrations: (a, b) 0.5M, (c, d) 1.0M, (e, f) 1.5M, (g, h) the blank Ni(OH)<sub>2</sub> hollow nanotubes, and (i, j) the blank PANI hollow nanotubes samples.

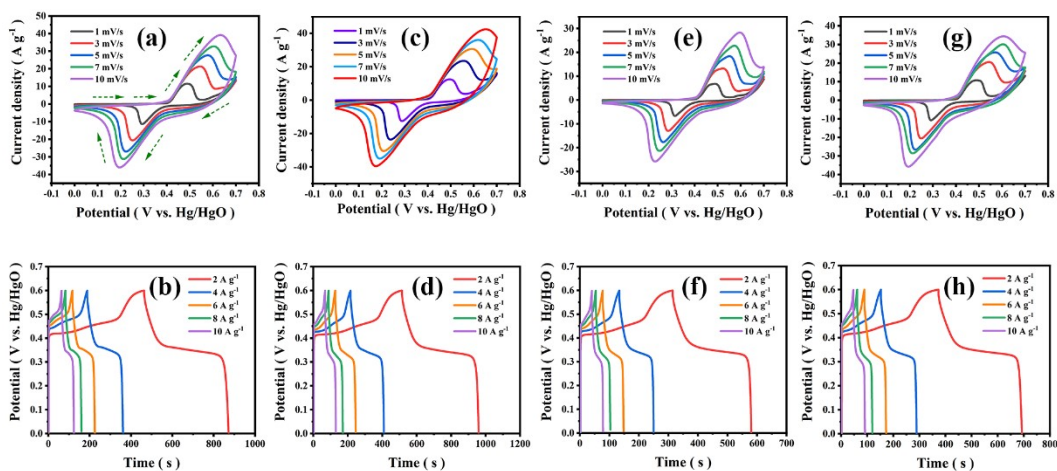

**Figure S11:** Electrochemical characterization of the CV and GCD curves of Ni<sub>2</sub>P@PANI-x and the blank samples prepared at different phosphorization ratios: (a, b) 1:1.2, (c, d) 1:2.2, (e, f) 1:3.2, and (g, h) the blank Ni<sub>2</sub>P hollow nanotubes samples.

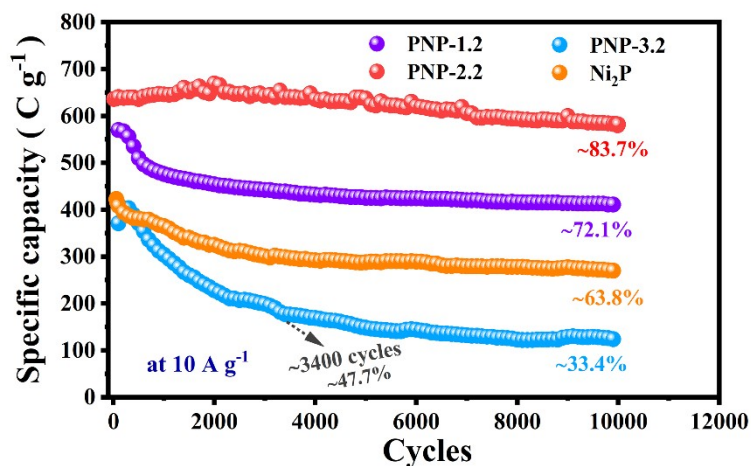

**Figure S12:** Cycling stability of PNP-x samples measured at a current density of 10 A

$\text{g}^{-1}$ .

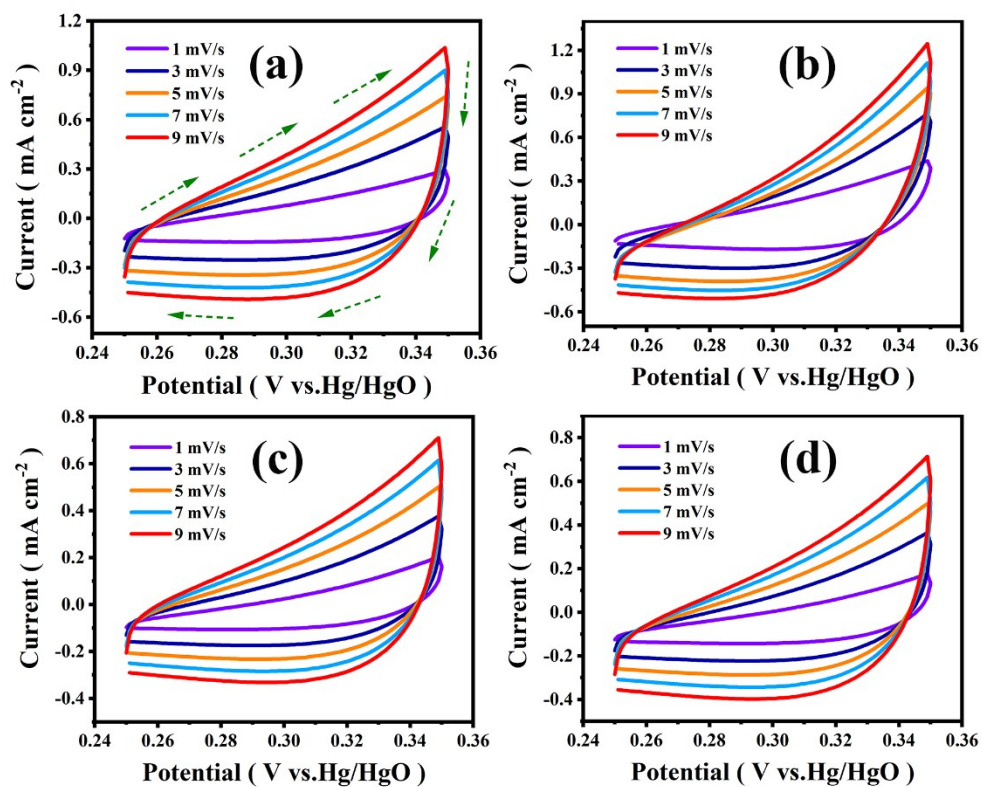

**Figure S13:** CV curves recorded at different scan rates between 0.25 and 0.35 V for (a)  $\text{Ni}_2\text{P@PANI-1.2}$ , (b)  $\text{Ni}_2\text{P@PANI-2.2}$ , (c)  $\text{Ni}_2\text{P@PANI-3.2}$ , and (d) the blank  $\text{Ni}_2\text{P}$  samples.

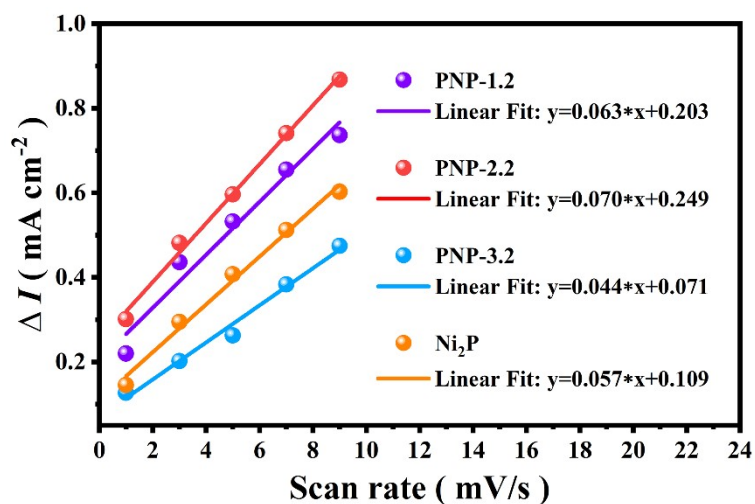

**Figure S14:**  $\Delta I$  measured at 0.30 V vs Hg/HgO plotted as a function of scan rate.

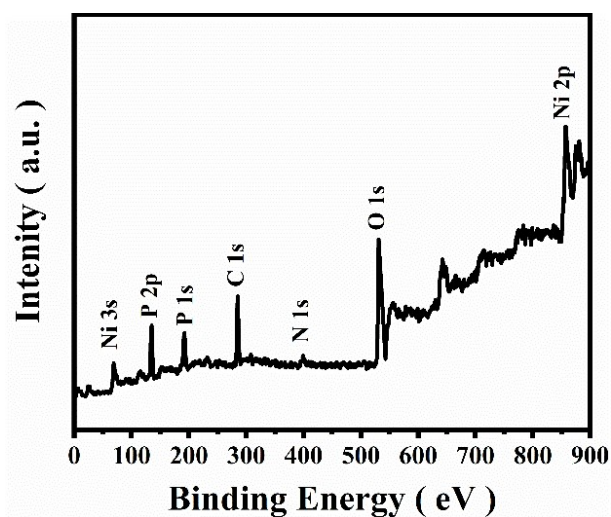

**Figure S15:** XPS survey spectrum of Ni<sub>2</sub>P@PANI hollow nanotubes samples.

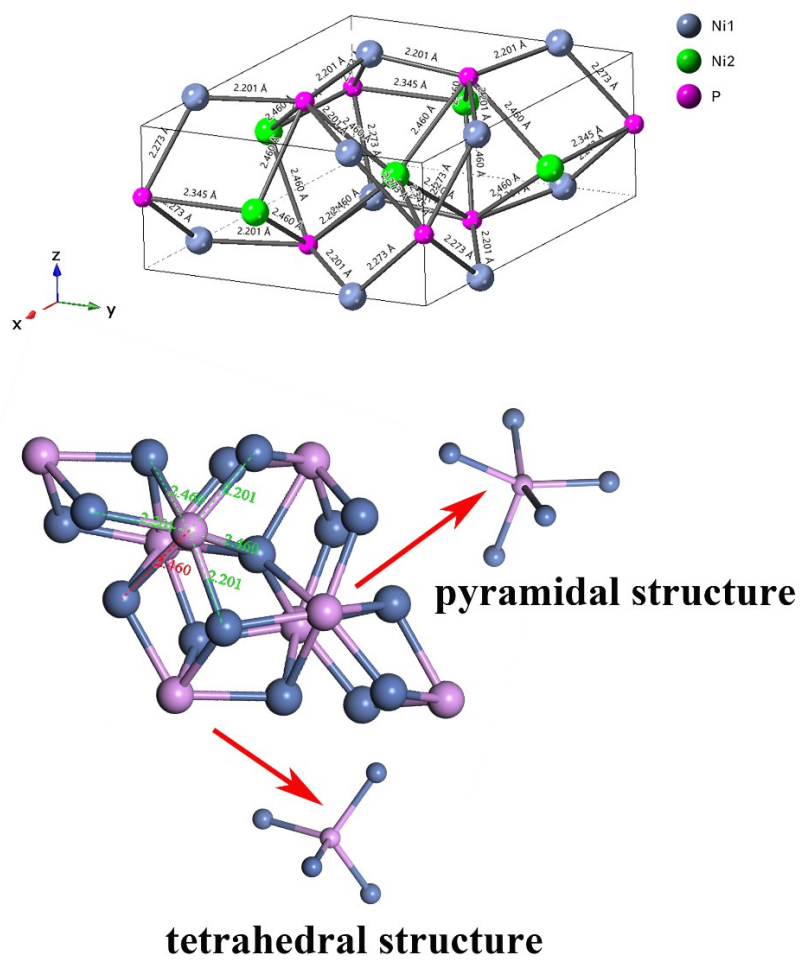

**Figure S16:**  $\text{Ni}_2\text{P}$  crystal structure unit and its composition.

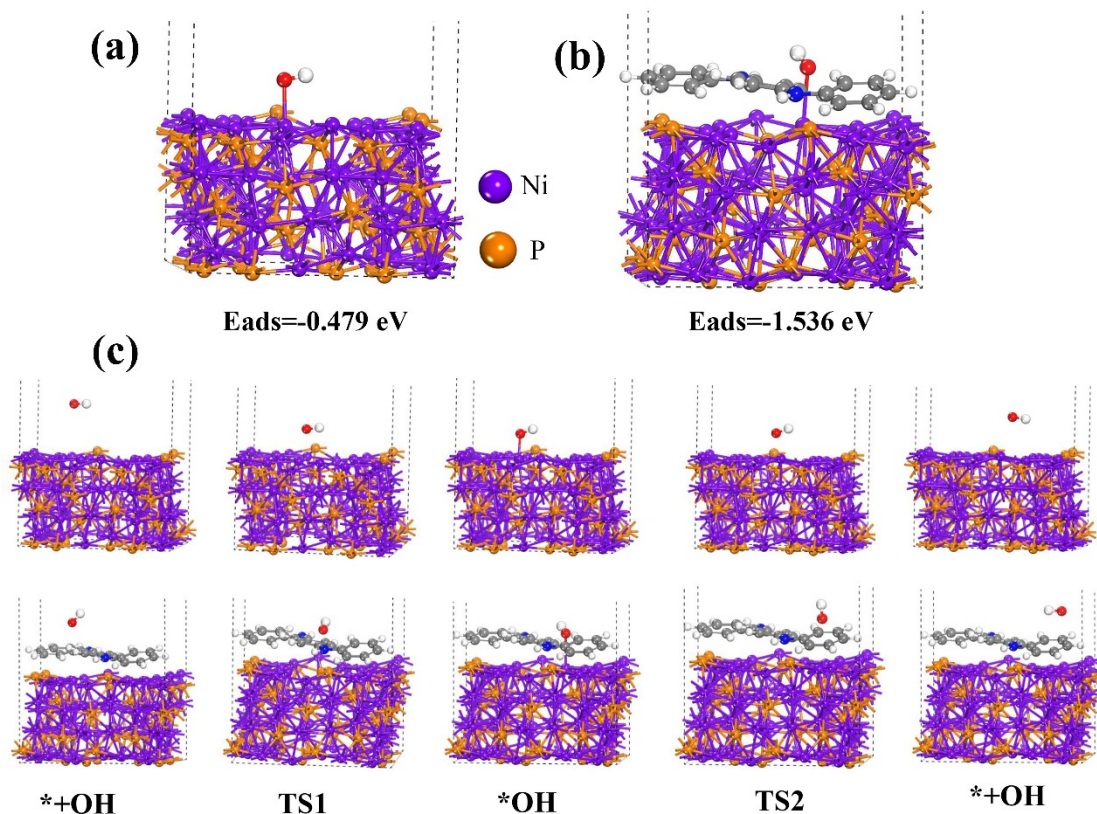

**Figure S17:** DFT calculations based on the transition state energy of adsorbed hydroxyl ( $\Delta G_{OH^-}$ ): (a) Energy barrier required for stable adsorption of  $OH^-$  on blank  $Ni_2P$  samples, (b) Energy barrier required for stable adsorption of  $OH^-$  on  $Ni_2P@PANI$  samples, and (c) the structure of  $OH^-$  adsorption and desorption in the structure of the blank  $Ni_2P$  and  $PANI@Ni_2P$  samples.

### Computational methods

We had employed the Vienna Ab Initio Package (VASP) [S2, S3] to perform all the density functional theory (DFT) calculations within the generalized gradient approximation (GGA) using the PBE formulation [S4]. We had chosen the projected augmented wave (PAW) potentials to describe the ionic cores and taken valence electrons into account using a plane wave basis set with a kinetic energy cutoff of 400 eV [S5, S6]. Partial occupancies of the Kohn-Sham orbitals were allowed using the

Gaussian smearing method and a width of 0.05 eV. The electronic energy was considered self-consistent when the energy change was smaller than  $10^{-4}$  eV. A geometry optimization was considered convergent when the force change was smaller than 0.05 eV/Å. The vacuum spacing perpendicular to the plane of the structure is 18 Å. The Brillouin zone integral uses the surfaces structures of  $1 \times 1 \times 1$  monkhorst pack K point sampling. Finally, the adsorption energies ( $E_{ads}$ ) are calculated as  $E_{ads} = E_{ad/sub} - E_{ad} - E_{sub}$ , where  $E_{ad/sub}$ ,  $E_{ad}$  and  $E_{sub}$  are the optimized adsorbate/substrate system, the adsorbate in the structure and the clean substrate respectively. The free energy is calculated as follows:

$$G = E + ZPE - TS \quad (8)$$

where  $G$ ,  $E$ ,  $ZPE$  and  $TS$  are the free energy, total energy from DFT calculations, zero-point energy and entropic contributions, respectively. In our calculation, the  $U$  had been employed to calculate the electronic properties, and the 3.68 eV for 3d had been used in our systems.

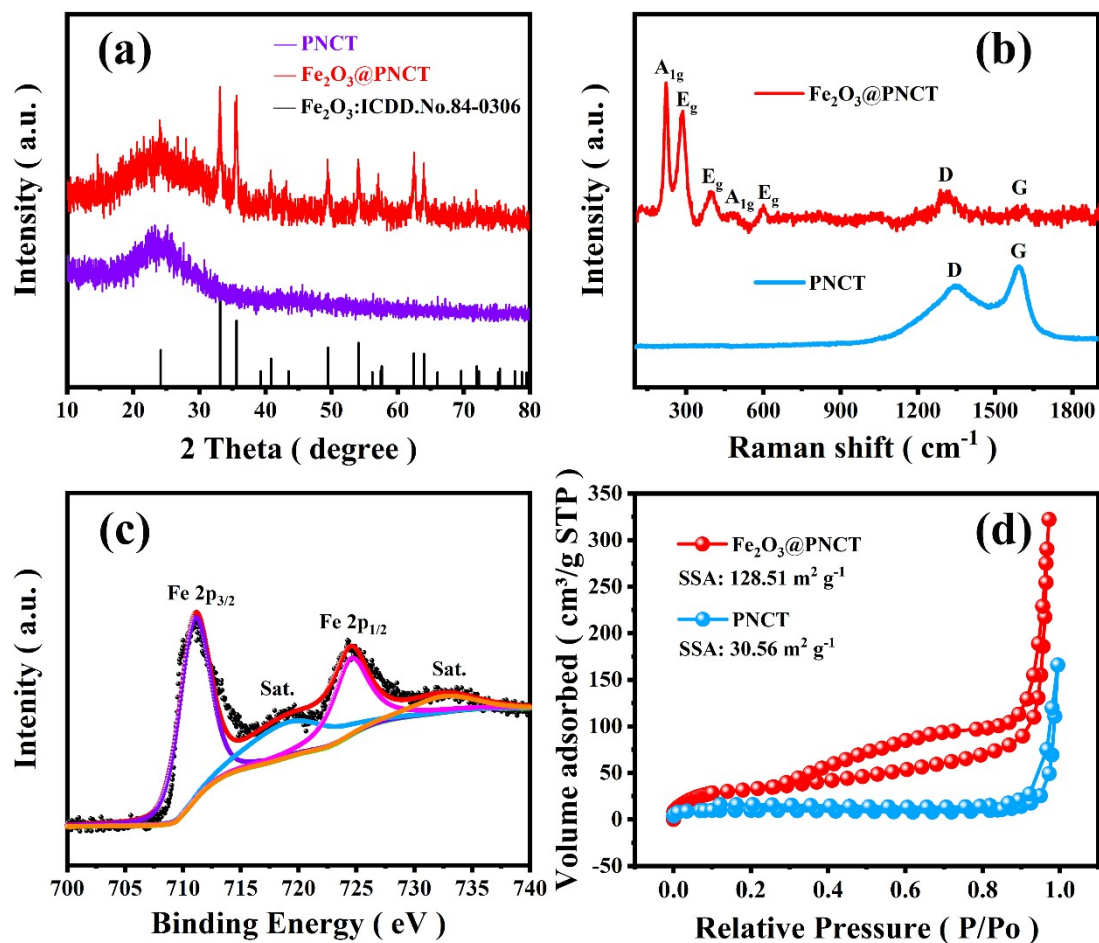

**Figure S18:** Structural characterization of  $\text{Fe}_2\text{O}_3@\text{PNCT}$  samples: (a) XRD patterns, (b) Raman spectrum (powder samples tested at room temperature with a 532 nm laser and calibrated against the value of  $520.7\text{ cm}^{-1}$  of a silicon wafer), (c) Fe 2p XPS spectrum, and (d)  $\text{N}_2$  adsorption-desorption isotherms.

The phase composition of the product was characterized by XRD, as shown in **Figure S18(a)**. The XRD spectra of  $\text{Fe}_2\text{O}_3@\text{PNCT}$  (red spectrum) and PNCT precursor (purple spectrum) both had two relatively broad diffraction peaks at  $2\theta$  of  $\sim 23.9^\circ$  and  $\sim 43.8^\circ$ , which were assigned to the graphitic structure of  $\text{sp}^2$  hybridization after pyrolytic carbonization. The strong diffraction peaks at the  $2\theta$  of  $24.2, 33.2, 35.6, 40.8, 49.5, 54.1, 57.4, 62.4, 64.0, 71.9,$  and  $75.5^\circ$  matched



well with the characteristic diffraction peaks of the rhombohedral phase  $\text{Fe}_2\text{O}_3$ , respectively (ICDD No. 84-0306) [49]. The Raman spectroscopy further characterized the sample structural information, as shown in **Figure S18(b)**. The spectral peaks at  $\sim 214.3$  and  $479.2 \text{ cm}^{-1}$  correspond to Fe-O symmetric stretching vibrations ( $A_{1g}$  mode), while the peaks near  $\sim 277.6$ ,  $391.2$ , and  $593.8 \text{ cm}^{-1}$  correspond to Fe-O symmetric bending vibrations of  $\text{Fe}_2\text{O}_3$  ( $E_g$  mode), and the peaks at  $\sim 1307.8$  and  $1608.3 \text{ cm}^{-1}$  correspond to the D and G bands of carbon [S37]. In addition, the chemical composition and valence of the surface of  $\text{Fe}_2\text{O}_3@$ PNCT samples were analyzed by XPS. The survey spectrum of the samples showed the presence of Fe, C, N and O (**Figure S19**). In the high-resolution Fe 2p spectrum, **Figure S18(c)**, the two peaks at  $\sim 724.5$  and  $711.2 \text{ eV}$  correspond to the spin-orbit split electrons of Fe  $2p_{1/2}$  and Fe  $2p_{3/2}$  in  $\text{Fe}_2\text{O}_3$  [8, S37]. Finally, nitrogen adsorption-desorption tests were conducted for PNCT and  $\text{Fe}_2\text{O}_3@$ PNCT to characterize the pore structure and specific surface area, and the results were shown in **Figure S18(d)** and **Figure S20**. The  $\text{Fe}_2\text{O}_3@$ PNCT had a high specific surface area of  $128.51 \text{ m}^2 \text{ g}^{-1}$  and an average pore size distribution of  $17.65 \text{ nm}$ , which was much larger than that of PNCT at  $30.56 \text{ m}^2 \text{ g}^{-1}$  and  $8.47 \text{ nm}$ . A large specific surface area of  $\text{Fe}_2\text{O}_3@$ PNCT with a rational pore size distribution ensures a fast electron and ion transport, which will contribute to the electrochemical performance of the electrode.

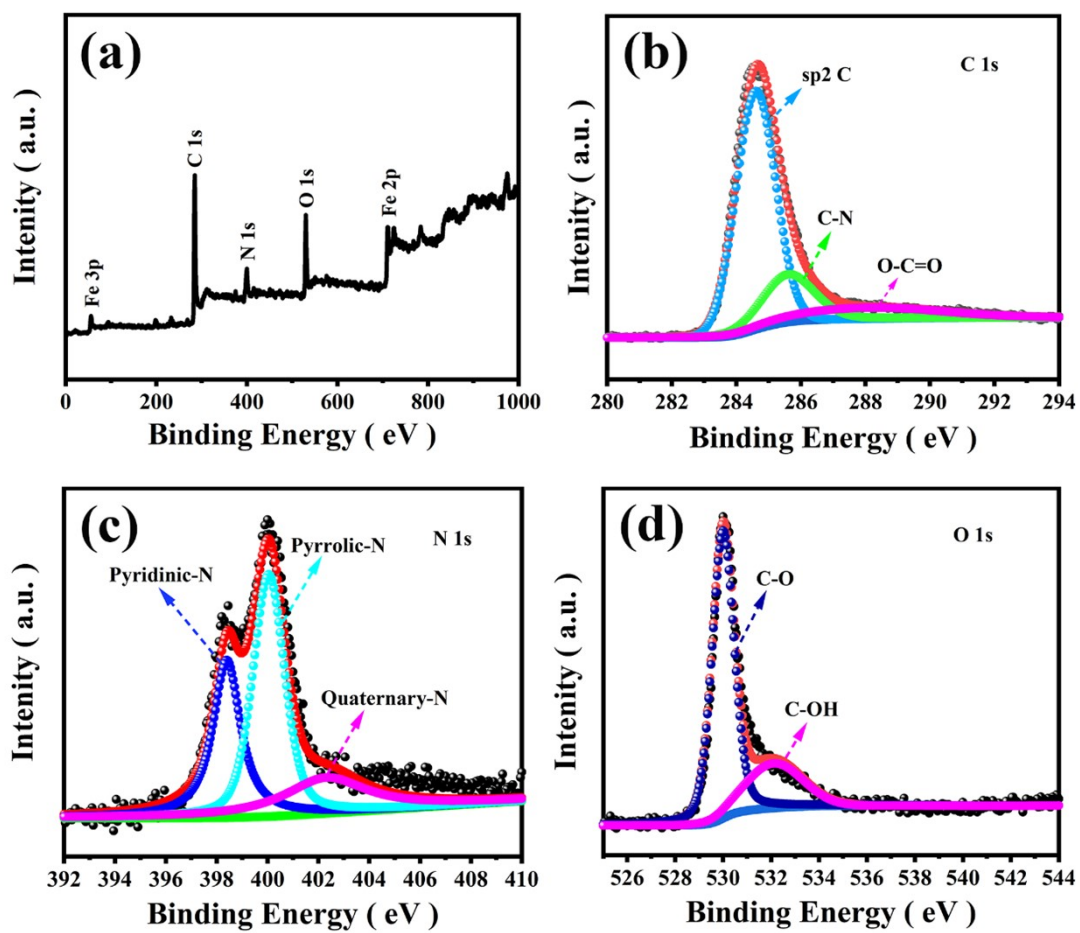

**Figure S19:** XPS spectrum of  $\text{Fe}_2\text{O}_3@\text{PNCT}$ : (a) XPS survey of  $\text{Fe}_2\text{O}_3@\text{PNCT}$ , (b) C 1s, (c) N 1s, and (d) O 1s.

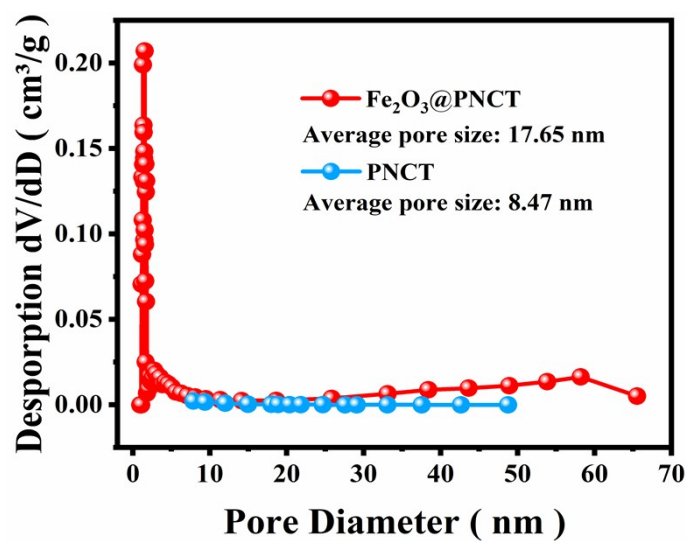

**Figure S20:** Pore-size distribution curve of Fe<sub>2</sub>O<sub>3</sub>@PNCT and PNCT samples obtained from the BJH method.

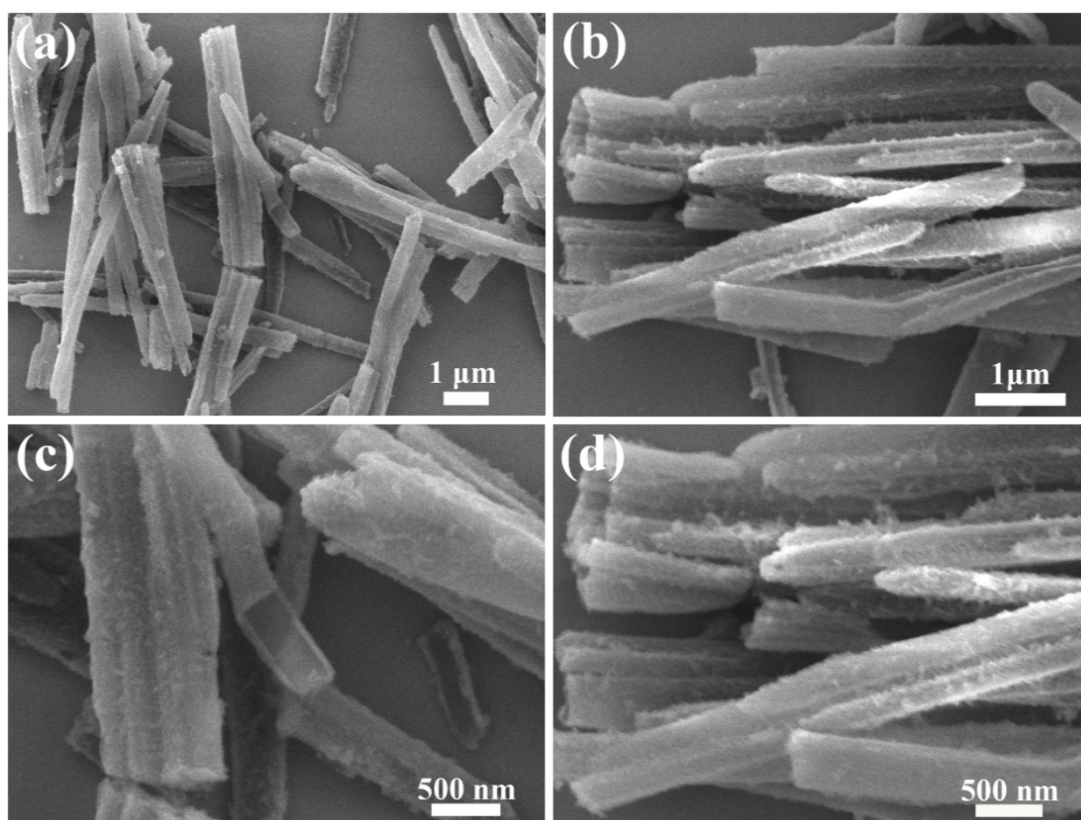

**Figure S21:** The morphology of PANI nanotubes obtained after the removal of MoO<sub>3</sub> template.

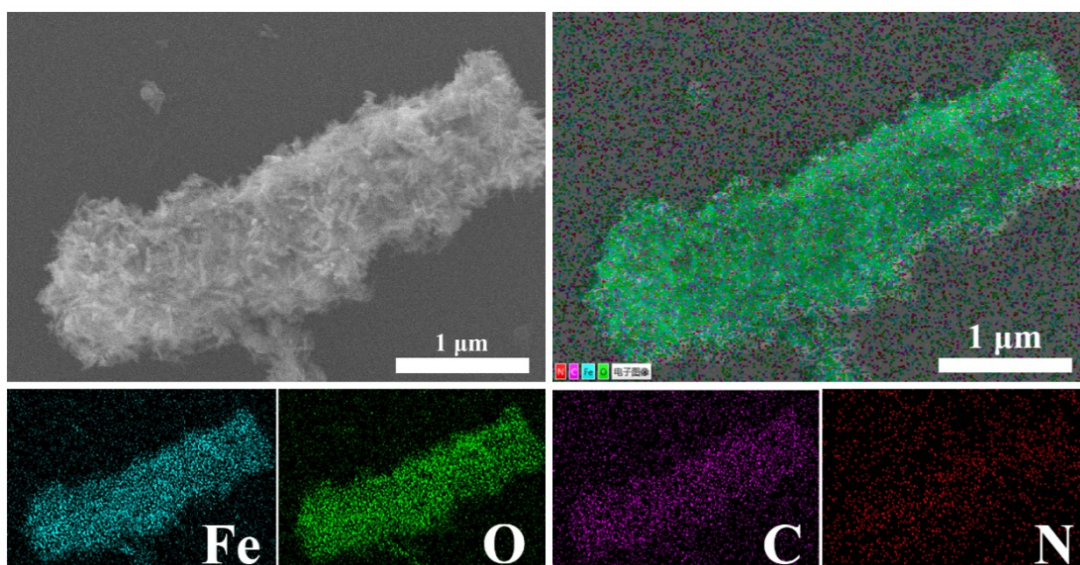

**Figure S22:** SEM of  $\text{Fe}_2\text{O}_3@\text{PNCT}$  and the corresponding elemental mappings of different elements.

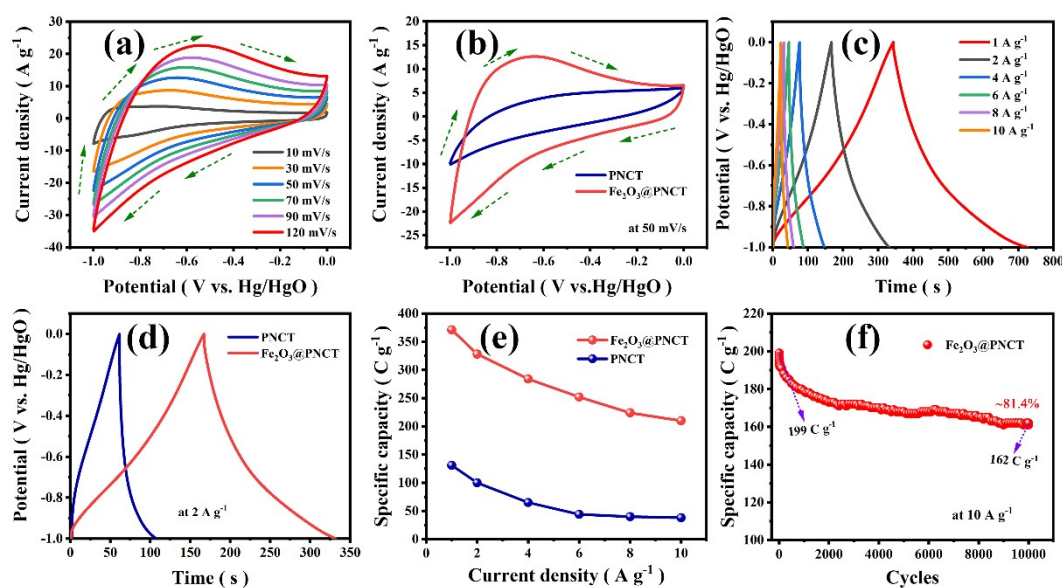

**Figure S23:** Electrochemical performances of negative electrode: (a) CV curves of the  $\text{Fe}_2\text{O}_3@\text{PNCT}$  electrode at various scan rates, (b) comparative CV curves of  $\text{Fe}_2\text{O}_3@\text{PNCT}$  at  $50 \text{ mV s}^{-1}$ , (c) GCD curves of  $\text{Fe}_2\text{O}_3@\text{PNCT}$  at different current densities in the range of  $1\text{--}10 \text{ A g}^{-1}$ , (d) comparative GCD curves of PNCT and  $\text{Fe}_2\text{O}_3@\text{PNCT}$  samples at  $2 \text{ A g}^{-1}$ , (e) GCD curves of PNCT and  $\text{Fe}_2\text{O}_3@\text{PNCT}$  samples as a function of discharge current density, and (f) cycling stability of  $\text{Fe}_2\text{O}_3@\text{PNCT}$  measured at a current density of  $10 \text{ A g}^{-1}$ .

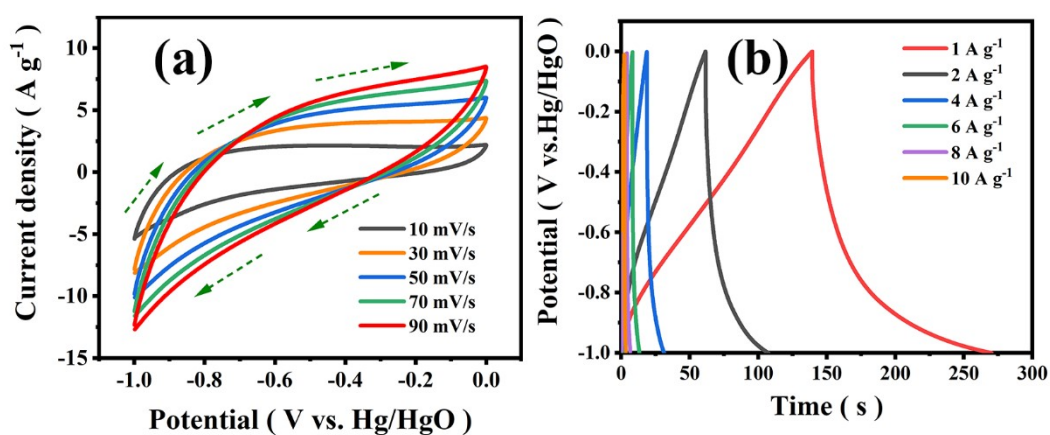

**Figure S24:** Electrochemical performances of the blank PNCT electrodes: (a) CV curves at various scan rates, and (b) GCD curves at different current densities in the range of 1-10 A g<sup>-1</sup>.

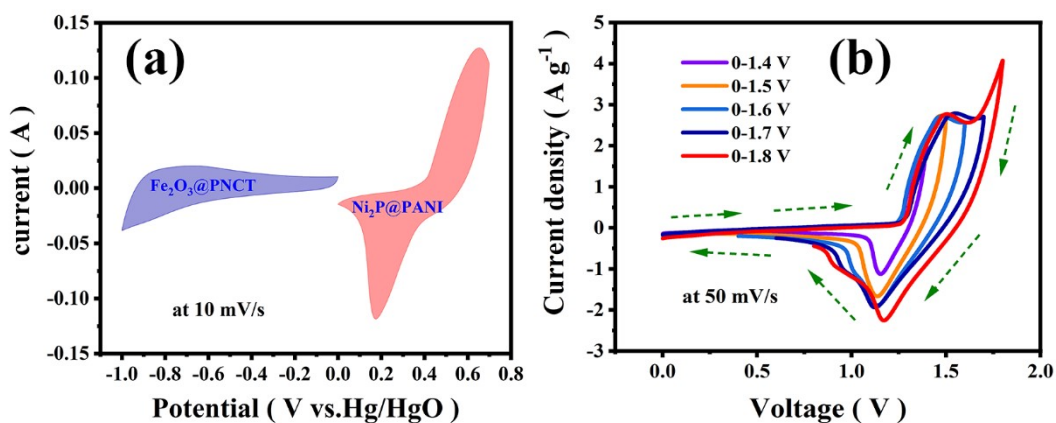

**Figure S25:** (a) CV curves of Ni<sub>2</sub>P@PANI positive electrode and Fe<sub>2</sub>O<sub>3</sub>@PNCT negative electrode in a three-electrode system at 10 mV s<sup>-1</sup> after charge balancing, (b) CV curves of the device measured in different voltage ranges.

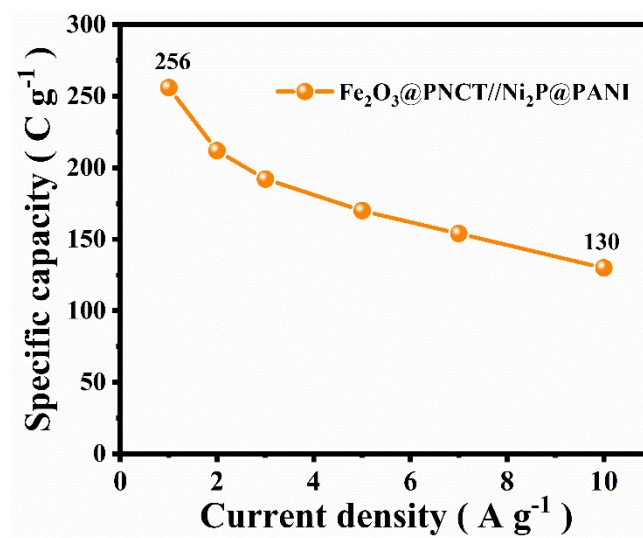

**Figure S26:** Rate capability of Fe<sub>2</sub>O<sub>3</sub>@PNCT//Ni<sub>2</sub>P@PANI QSSC devices.

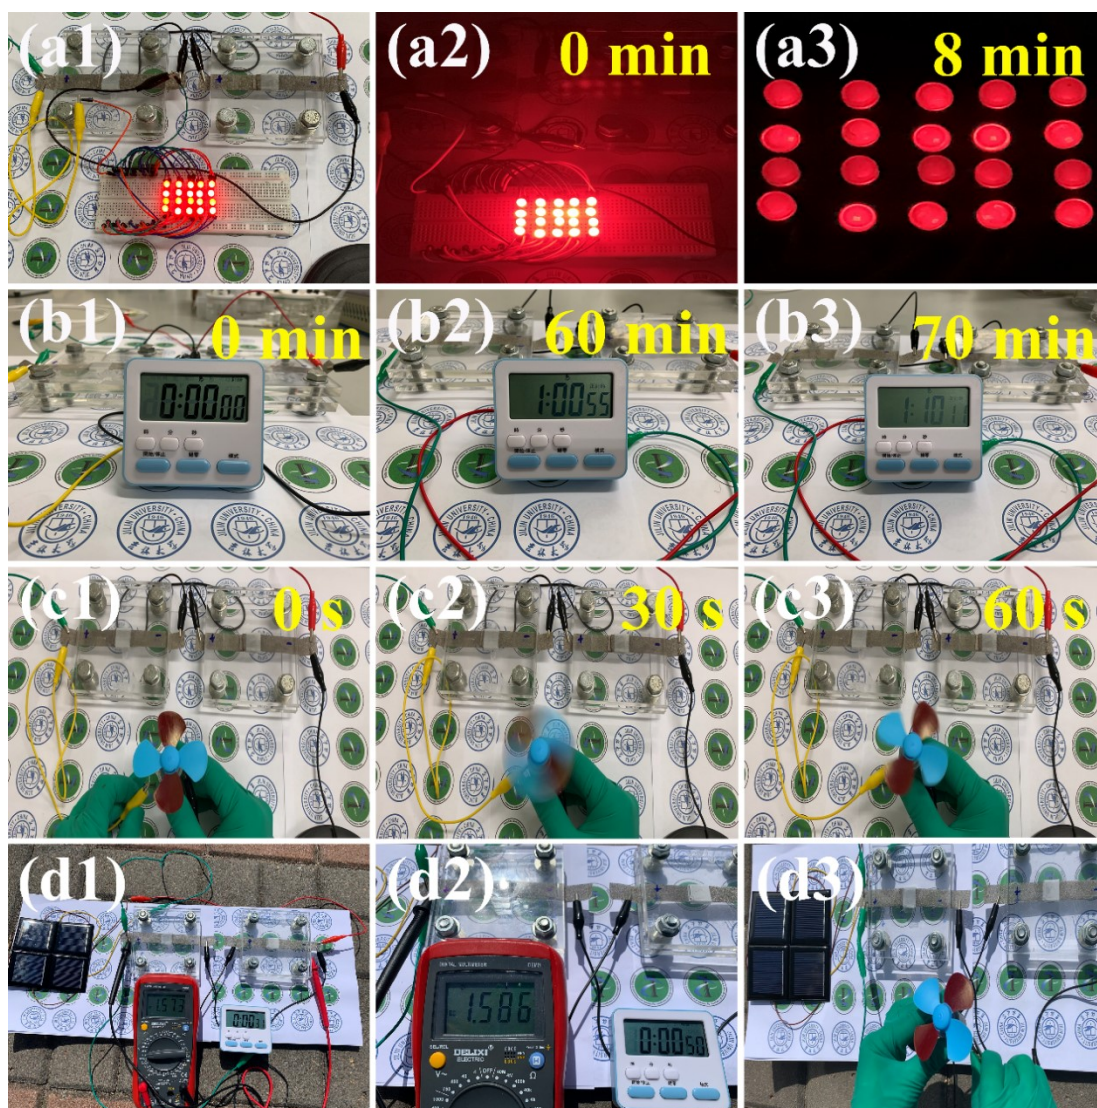

**Figure S27:** The digital photographs show the practical application of the device: (a1-a3) two devices in series could stably light a light source consisting of 20 red LEDs, (b1-b3) power the alarm clock, (c1-c3) drive a small fan, and (d1-d3) the energy storage and supply system built in combination with commercial solar panels.

**Table S1:** Comparisons of Ni<sub>2</sub>P@PANI electrodes and QSSC devices performance with previous work.

| <b>Electrode</b>                                    | <b>Capacity</b><br>(Current density)                       | <b>Cell</b><br>(Config)                                         | <b>Cycles</b><br>(devices) | <b>Retention</b><br>(devices) | <b>ΔV</b><br>(V) | <b>ED</b><br>(Wh kg <sup>-1</sup> ) | <b>Ref.</b>      |
|-----------------------------------------------------|------------------------------------------------------------|-----------------------------------------------------------------|----------------------------|-------------------------------|------------------|-------------------------------------|------------------|
| <b>Ni<sub>2</sub>P@PANI hollow nanotube</b>         | <b>866 C g<sup>-1</sup></b><br><b>2.0 A g<sup>-1</sup></b> | <b>2E</b><br><b>Fe<sub>2</sub>O<sub>3</sub>@</b><br><b>PNCT</b> | <b>10,000</b>              | <b>79.8%</b>                  | <b>1.70</b>      | <b>60.60</b>                        | <b>This work</b> |
| Ni <sub>2</sub> P NS/NF                             | 1398 C g <sup>-1</sup><br>2.5 A g <sup>-1</sup>            | 2E<br>AC                                                        | 5000                       | 91.3%                         | 1.60             | 26.00                               | S7               |
| Ni-P                                                | 448 C g <sup>-1</sup><br>2.0 A g <sup>-1</sup>             | 2E<br>AC                                                        | 1000                       | 84.5%                         | 1.60             | 29.20                               | S8               |
| Ni <sub>2</sub> P/Ni/C                              | 521 C g <sup>-1</sup><br>2.0 A g <sup>-1</sup>             | 2E<br>AC                                                        | 5000                       | 99.0%                         | 1.40             | 32.02                               | S9               |
| Ni <sub>2</sub> P or Ni <sub>5</sub> P <sub>4</sub> | 337 C g <sup>-1</sup><br>1.0 A g <sup>-1</sup>             | 2E<br>Fe <sub>2</sub> O <sub>3</sub>                            | 1000                       | 96.0%                         | 1.60             | 35.50                               | S10              |
| Co <sub>2</sub> P nanorod                           | 270 C g <sup>-1</sup><br>2.0 A g <sup>-1</sup>             | 2E<br>Graphene                                                  | 6000                       | 97.0%                         | 1.50             | 24.00                               | S11              |
| Cu <sub>3</sub> P nanorod                           | 1400 C g <sup>-1</sup><br>2.0 A g <sup>-1</sup>            | 2E<br>AC                                                        | 15,000                     | 65.0%                         | 1.50             | 76.85                               | S12              |
| Ni <sub>12</sub> P <sub>5</sub> nanowires           | 707 C g <sup>-1</sup><br>1.0 A g <sup>-1</sup>             | 2E<br>AC                                                        | 100                        | ~55.0%                        | 1.60             | 108.20                              | S13              |
| NiO-GNS/PANI                                        | 744 C g <sup>-1</sup><br>2.0 A g <sup>-1</sup>             | 2E<br>Sym.                                                      | 1000                       | 86.0%                         | 0.60             | ---                                 | S14              |
| Co <sub>x</sub> Ni <sub>1-x</sub> P/CNF             | 1405 C g <sup>-1</sup><br>5.0 A g <sup>-1</sup>            | 2E<br>AC                                                        | 10,000                     | 72.0%                         | 1.40             | 32.20                               | S15              |
| Ni <sub>x</sub> P <sub>y</sub> nanosheets           | 1272 C g <sup>-1</sup><br>2.0 A g <sup>-1</sup>            | 2E AC                                                           | 5000                       | 84.6%                         | 1.50             | 67.20                               | S16              |
| Ni-P@NiCo-LDH                                       | 1449 C g <sup>-1</sup><br>2.5 A g <sup>-1</sup>            | 2E<br>AC                                                        | 5000                       | 70.0%                         | 1.60             | 35.10                               | S17              |
| CoP@NiCoP nanowire                                  | 956 C g <sup>-1</sup><br>2.0 A g <sup>-1</sup>             | 2E<br>Fe <sub>2</sub> O <sub>3</sub>                            | 1000                       | 73.3%                         | 1.75             | 37.16                               | S18              |
| 2D nickel phosphate                                 | 176 C g <sup>-1</sup><br>2.0 A g <sup>-1</sup>             | 2E<br>AC                                                        | 5000                       | 100.0%                        | 1.45             | 50.00                               | S19              |
| FeNiP@CoNi-LDH                                      | 975 C g <sup>-1</sup><br>2.0 A g <sup>-1</sup>             | 2E<br>PC                                                        | 20,000                     | 73.9%                         | 1.60             | 87.30                               | S20              |
| NiP@CoAl-LDH                                        | 556 C g <sup>-1</sup><br>1.7 A g <sup>-1</sup>             | 2E<br>AC                                                        | 4000                       | 95.5%                         | 1.60             | 37.18                               | S21              |
| NiCoP/ NiCo-OH                                      | 550 C g <sup>-1</sup><br>1.0 A g <sup>-1</sup>             | 2E<br>PC                                                        | 1000                       | 92.0%                         | 1.60             | 34.00                               | S22              |
| Ni-PANI                                             | 315 C g <sup>-1</sup><br>2.0 A g <sup>-1</sup>             | 3E                                                              | 5000                       | ~75.0%                        | ---              | ---                                 | S23              |



|                    |                                                |          |        |       |      |       |     |
|--------------------|------------------------------------------------|----------|--------|-------|------|-------|-----|
| NiCoP@NiCo-LDH     | 728 C g <sup>-1</sup><br>2.0 A g <sup>-1</sup> | 2E<br>AC | 10,000 | 97.0% | 1.70 | 57.00 | S24 |
| NiCoP@NF nanosheet | 780 C g <sup>-1</sup><br>2.0 A g <sup>-1</sup> | 2E<br>AC | 500    | 67.2% | 1.20 | 27.00 | S25 |

**Note:** **3E** represents three-electrode systems for single-electrode, **2E** represents two-electrode systems for devices, **AC** represents the activated carbon, **PC** represents the porous carbon, **Sym.** represents the symmetrical devices, and --- represents not mentioned. All values in **Table S1** were recalculated using the standard set of **equation (4)** (as reported in the experimental part) for normalization and more meaningful comparisons.

**Table S2:** Parameters of the proposed equivalent circuit model.

| Electrode                  | $R_s$ ( $\Omega$ ) | $R_{ct}$ ( $\Omega$ ) | $Z_w$ ( $\Omega$ ) |
|----------------------------|--------------------|-----------------------|--------------------|
| Ni <sub>2</sub> P@PANI-1.2 | 0.78               | 7.85                  | 7.18               |
| Ni <sub>2</sub> P@PANI-2.2 | <b>0.76</b>        | <b>5.50</b>           | <b>6.67</b>        |
| Ni <sub>2</sub> P@PANI-3.2 | 2.00               | 16.05                 | 12.09              |
| Ni <sub>2</sub> P          | 0.79               | 13.19                 | 8.28               |

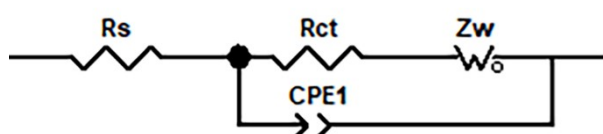

**Figure S28:** Equivalent Simulation Circuit.

**Table S3:** Comparisons of Fe<sub>2</sub>O<sub>3</sub>@PNCT electrodes performance with previous work.

| Electrode                                                         | Capacity<br>(Current density)                  | Electrolyte                           | Cycles<br>(3E) | Retention<br>(3E) | $\Delta V$<br>(V) | Ref.      |
|-------------------------------------------------------------------|------------------------------------------------|---------------------------------------|----------------|-------------------|-------------------|-----------|
| Fe <sub>2</sub> O <sub>3</sub> @PNCT                              | 371 C g <sup>-1</sup><br>1 A g <sup>-1</sup>   | 2 M KOH                               | 10,000         | 81.4%             | 1.0               | This work |
| FeOCl                                                             | 278 C g <sup>-1</sup><br>0.8 A g <sup>-1</sup> | 1 M Na <sub>2</sub> SO <sub>4</sub>   | 10,000         | 75.0%             | 1.0               | S26       |
| g-C <sub>3</sub> N <sub>4</sub> /α-Fe <sub>2</sub> O <sub>3</sub> | 260 F g <sup>-1</sup><br>0.5 A g <sup>-1</sup> | 2.5 M Li <sub>2</sub> SO <sub>4</sub> | 1000           | 100.0%            | 1.0               | S27       |
| SiC@Fe <sub>2</sub> O <sub>3</sub>                                | 721 F g <sup>-1</sup><br>2.0 A g <sup>-1</sup> | 2 M KOH                               | ---            | ---               | 1.2               | S28       |
| α-Fe <sub>2</sub> O <sub>3</sub> /C                               | 345 F g <sup>-1</sup><br>1.8 A g <sup>-1</sup> | 1 M Na <sub>2</sub> SO <sub>4</sub>   | 4000           | 91.8%             | 1.0               | S29       |
| N doped<br>graphene/Fe <sub>2</sub> O <sub>3</sub>                | 260 F g <sup>-1</sup><br>2.0 A g <sup>-1</sup> | 1 M Na <sub>2</sub> SO <sub>4</sub>   | 1000           | 82.5%             | 1.2               | S30       |
| Fe <sub>2</sub> O <sub>3</sub> /N-CNT                             | 264 F g <sup>-1</sup><br>1.0 A g <sup>-1</sup> | 2 M KOH                               | 10,000         | 84.0%             | 1.0               | S31       |
| α-Fe <sub>2</sub> O <sub>3</sub> /rGO                             | 270 F g <sup>-1</sup><br>1.0 A g <sup>-1</sup> | 1 M Na <sub>2</sub> SO <sub>4</sub>   | 5000           | 123.0%            | 1.5               | S32       |
| Fe <sub>7</sub> S <sub>8</sub> /α-FeOOH                           | 520 F g <sup>-1</sup><br>1.0 A g <sup>-1</sup> | 1 M KOH                               | 5000           | 90.6%             | 1.1               | S33       |
| PANI@Fe <sub>3</sub> O <sub>4</sub> @C<br>F                       | 245 F g <sup>-1</sup><br>0.5 A g <sup>-1</sup> | 1 M H <sub>2</sub> SO <sub>4</sub>    | 10,000         | 82.4%             | 0.65              | S34       |
| FeS <sub>2</sub> nano-<br>ellipsoids                              | 515 C g <sup>-1</sup><br>1.0 A g <sup>-1</sup> | 2 M KOH                               | 5000           | 88%               | 1.1               | S35       |
| NS-Fe <sub>3</sub> O <sub>4</sub> @N-PC                           | 866 F g <sup>-1</sup><br>1.0 A g <sup>-1</sup> | 1 M KOH                               | 5000           | 78.2%             | 0.4               | S36       |

**Note:** 3E represents three-electrode systems for single-electrode and the values of  $\Delta V$  in **Table S3** are all obtained from the discharge voltage range in the GCD curves in the cited reference.

**Table S4:** The mass loading of active material in three-electrode system for all samples.

| <b>Electrode</b>                     | <b>M<sub>total</sub></b><br><b>( mg cm<sup>-2</sup> )</b> | <b>Percentage</b><br><b>( % )</b> | <b>M<sub>active</sub></b><br><b>( mg cm<sup>-2</sup> )</b> | <b>Average</b>   |
|--------------------------------------|-----------------------------------------------------------|-----------------------------------|------------------------------------------------------------|------------------|
| Ni(OH) <sub>2</sub> @PANI-0.5M       | 4.56                                                      |                                   | 3.65                                                       |                  |
|                                      | 4.71                                                      | 8:1:1                             | 3.77                                                       | 3.5 ± 0.5        |
|                                      | 4.12                                                      |                                   | 3.29                                                       |                  |
| Ni(OH) <sub>2</sub> @PANI-1.0M       | <b>5.11</b>                                               |                                   | <b>4.08</b>                                                |                  |
|                                      | <b>5.63</b>                                               | <b>8:1:1</b>                      | <b>4.50</b>                                                | <b>4.0 ± 0.5</b> |
|                                      | <b>4.43</b>                                               |                                   | <b>3.54</b>                                                |                  |
| Ni(OH) <sub>2</sub> @PANI-1.5M       | 4.27                                                      |                                   | 3.42                                                       |                  |
|                                      | 4.61                                                      | 8:1:1                             | 3.69                                                       | 3.4 ± 0.5        |
|                                      | 4.83                                                      |                                   | 3.86                                                       |                  |
| Ni(OH) <sub>2</sub>                  | 5.03                                                      |                                   | 4.02                                                       |                  |
|                                      | 4.08                                                      | 8:1:1                             | 3.26                                                       | 3.5 ± 0.5        |
|                                      | 4.52                                                      |                                   | 3.62                                                       |                  |
| Ni <sub>2</sub> P@PANI-1.2           | 3.92                                                      |                                   | 3.14                                                       |                  |
|                                      | 4.64                                                      | 8:1:1                             | 3.71                                                       | 3.6 ± 0.5        |
|                                      | 5.22                                                      |                                   | 4.18                                                       |                  |
| Ni <sub>2</sub> P@PANI-2.2           | <b>4.39</b>                                               |                                   | <b>3.51</b>                                                |                  |
|                                      | <b>5.10</b>                                               | <b>8:1:1</b>                      | <b>4.08</b>                                                | <b>3.5 ± 0.5</b> |
|                                      | <b>4.13</b>                                               |                                   | <b>3.30</b>                                                |                  |
| Ni <sub>2</sub> P@PANI-3.2           | 5.20                                                      |                                   | 4.16                                                       |                  |
|                                      | 6.35                                                      | 8:1:1                             | 5.08                                                       | 4.5 ± 0.5        |
|                                      | 5.82                                                      |                                   | 4.66                                                       |                  |
| Ni <sub>2</sub> P                    | 3.63                                                      |                                   | 2.90                                                       |                  |
|                                      | 3.52                                                      | 8:1:1                             | 2.82                                                       | 2.8 ± 0.5        |
|                                      | 4.10                                                      |                                   | 3.28                                                       |                  |
| Fe <sub>2</sub> O <sub>3</sub> @PNCT | <b>4.44</b>                                               |                                   | <b>3.55</b>                                                |                  |
|                                      | <b>5.03</b>                                               | <b>8:1:1</b>                      | <b>4.02</b>                                                | <b>4.0 ± 0.5</b> |
|                                      | <b>5.64</b>                                               |                                   | <b>4.51</b>                                                |                  |
| PNCT                                 | 4.66                                                      |                                   | 3.72                                                       |                  |
|                                      | 4.25                                                      | 8:1:1                             | 3.40                                                       | 3.5 ± 0.5        |
|                                      | 4.90                                                      |                                   | 3.92                                                       |                  |

**Note:** **M<sub>total</sub>** represents the total mass of the electrode material (2 cm × 2 cm), including the PTFE and acetylene black, **Percentage** represents the active material, acetylene

black, and PTFE in a mass ratio of 8:1:1,  $M_{\text{active}}$  represents the active material available on the actual electrode ( $2 \text{ cm} \times 2 \text{ cm}$ ), and the **Average** represents the mass loading range of the active material on the electrode (Since there is no guarantee that the operation is exactly the same during each electrode preparation, the mass loading deviation of each sample cannot be avoided. As such, an average specific capacity is more appropriate in this paper).

**Table S5:** The average specific capacity of the electrode under optimal phosphatization conditions.

| Electrode                       | $M_{\text{total}}$<br>( $\text{mg cm}^{-2}$ ) | Percentage<br>(%) | $M_{\text{active}}$<br>( $\text{mg cm}^{-2}$ ) | Capacity<br>( $\text{C g}^{-1}$ ) | Average<br>$e$<br>( $\text{C g}^{-1}$ ) |
|---------------------------------|-----------------------------------------------|-------------------|------------------------------------------------|-----------------------------------|-----------------------------------------|
|                                 | 4.39                                          | 8:1:1             | 3.51                                           | 892                               |                                         |
| <b>Ni<sub>2</sub>P@PANI-2.2</b> | 5.10                                          | 8:1:1             | 4.08                                           | 753                               | <b>~866</b>                             |
|                                 | 4.13                                          | 8:1:1             | 3.30                                           | 952                               |                                         |

**Note:** The electrode test was performed at  $2 \text{ A g}^{-1}$ .

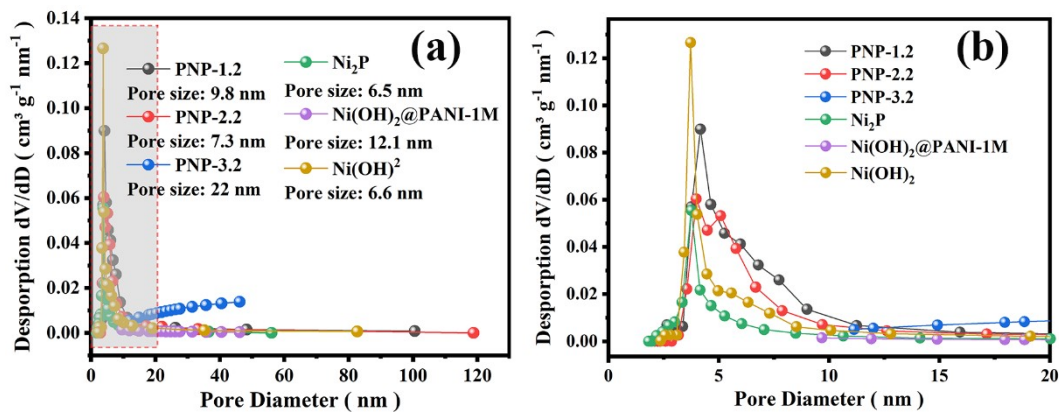

**Figure S29:** Pore-size distribution curve of PNP-x and precursor samples obtained from the BJH method (note that the data are average pore sizes).

## References

- [S1] Ma, F. X.; Wu, H. B.; Xia, B. Y.; Xu, C. Y.; Lou, X. W., Hierarchical  $\beta$ -Mo<sub>2</sub>C Nanotubes Organized by Ultrathin Nanosheets as a Highly Efficient Electrocatalyst for Hydrogen Production, *Angew. Chem., Int. Ed.* **2015**, *54* (51), 15395-9.
- [S2] Kresse, G.; Furthmüller, J., Efficient iterative schemes for ab initio total-energy calculations using a plane-wave basis set, *Phys. Rev. B Condens Matter.* **1996**, *54* (16), 11169-11186.
- [S3] Perdew, J. P.; Burke, K.; Ernzerhof, M., Generalized Gradient Approximation Made Simple, *Phys. Rev. Lett.* **1996**, *77* (18), 3865-3868.
- [S4] Kresse, G.; Joubert, D., From ultrasoft pseudopotentials to the projector augmented-wave method, *Phys. Rev. B* **1999**, *59* (3), 1758-1775.
- [S5] Blochl, P. E., Projector augmented-wave method, *Phys. Rev. B Condens Matter.* **1994**, *50* (24), 17953-17979.
- [S6] Grimme, S.; Antony, J.; Ehrlich, S.; Krieg, H., A consistent and accurate ab initio parametrization of density functional dispersion correction (DFT-D) for the 94 elements H-Pu, *J. Chem. Phys.* **2010**, *132* (15), 154104.
- [S7] Zhou, K.; Zhou, W.; Tang, Z.; Li, L.; Chen, S., Ultrahigh-Performance Pseudocapacitor Electrodes Based on Transition Metal Phosphide Nanosheets Array via Phosphorization: A General and Effective Approach, *Adv. Funct. Mater.* **2015**, *25* (48), 7530-7538.
- [S8] Wang, D.; Kong, L.-B.; Liu, M.-C.; Zhang, W.-B.; Luo, Y.-C.; Kang, L., Amorphous NiP materials for high performance pseudocapacitors, *J. Power Sources* **2015**, *274*, 1107-1113.
- [S9] Hou, S. J.; Xu, X. T.; Wang, M.; Xu, Y. Q.; Lu, T.; Yao, Y. F.; Pan, L. K., Carbon-incorporated Janus-type Ni<sub>2</sub>P/Ni hollow spheres for high performance hybrid supercapacitors, *J. Mater. Chem. A* **2017**, *5* (36), 19054-19061.
- [S10] Wang, D.; Kong, L. B.; Liu, M. C.; Luo, Y. C.; Kang, L., An Approach to Preparing Ni-P with Different Phases for Use as Supercapacitor Electrode Materials, *Chem. Eur. J.* **2015**, *21* (49), 17897-17903.

- [S11]Chen, X.; Cheng, M.; Chen, D.; Wang, R., Shape-Controlled Synthesis of Co<sub>2</sub>P Nanostructures and Their Application in Supercapacitors, *ACS Appl. Mater. Interfaces* **2016**, *8* (6), 3892-3900.
- [S12]Chodankar, N. R.; Shinde, P. A.; Patil, S. J.; Hwang, S. K.; Raju, G. S. R.; Ranjith, K. S.; Dubal, D. P.; Huh, Y. S.; Han, Y. K., Solution-free self-assembled growth of ordered tricopper phosphide for efficient and stable hybrid supercapacitor, *Energy Storage Mater.* **2021**, *39*, 194-202.
- [S13]Gan, Y.; Wang, C.; Chen, X.; Liang, P.; Wan, H. Z.; Liu, X.; Tan, Q. Y.; Wu, H.; Rao, H.; Wang, H. B.; Zhang, J.; Wang, Y.; van Aken, P. A.; Wang, H., High conductivity Ni<sub>12</sub>P<sub>5</sub> nanowires as high-rate electrode material for battery-supercapacitor hybrid devices, *Chem. Eng. J.* **2020**, *392*.
- [S14]Wu, X. M.; Wang, Q. G.; Zhang, W. Z.; Wang, Y.; Chen, W. X., Nano nickel oxide coated graphene/polyaniline composite film with high electrochemical performance for flexible supercapacitor, *Electrochim. Acta* **2016**, *211*, 1066-1075.
- [S15]Zhang, N.; Li, Y.; Xu, J.; Li, J.; Wei, B.; Ding, Y.; Amorim, I.; Thomas, R.; Thalluri, S. M.; Liu, Y.; Yu, G.; Liu, L., High-Performance Flexible Solid-State Asymmetric Supercapacitors Based on Bimetallic Transition Metal Phosphide Nanocrystals, *ACS Nano* **2019**, *13* (9), 10612-10621.
- [S16]Liu, S.; Sankar, K. V.; Kundu, A.; Ma, M.; Kwon, J. Y.; Jun, S. C., Honeycomb-Like Interconnected Network of Nickel Phosphide Heteronanoparticles with Superior Electrochemical Performance for Supercapacitors, *ACS Appl. Mater. Interfaces* **2017**, *9* (26), 21829-21838.
- [S17]Xing, J.; Du, J.; Zhang, X.; Shao, Y.; Zhang, T.; Xu, C., A Ni-P@NiCo LDH core-shell nanorod-decorated nickel foam with enhanced areal specific capacitance for high-performance supercapacitors, *Dalton Trans.* **2017**, *46* (30), 10064-10072.
- [S18]Wang, X.; Jing, C.; Zhang, W. Z.; Wang, X. S.; Liu, X. Y.; Dong, B. Q.; Zhang, Y. X., One-step phosphorization synthesis of CoP@NiCoP nanowire/nanosheet composites hybrid arrays on Ni foam for high-performance supercapacitors, *Appl. Surf. Sci.* **2020**, *532*.

- [S19]Wulan Septiani, N. L.; Kaneti, Y. V.; Fathoni, K. B.; Wang, J.; Ide, Y.; Yulianto, B.; Nugraha; Dipojono, H. K.; Nanjundan, A. K.; Golberg, D.; Bando, Y.; Yamauchi, Y., Self-assembly of nickel phosphate-based nanotubes into two-dimensional crumpled sheet-like architectures for high-performance asymmetric supercapacitors, *Nano Energy* **2020**, *67*.
- [S20]Wan, L.; Chen, D. Q.; Liu, J. X.; Zhang, Y.; Chen, J.; Xie, M. J.; Du, C., Construction of FeNiP@CoNi-layered double hydroxide hybrid nanosheets on carbon cloth for high energy asymmetric supercapacitors, *J. Power Sources* **2020**, *465*.
- [S21]Wang, S. L.; Huang, Z. C.; Li, R.; Zheng, X.; Lu, F. X.; He, T. B., Template-assisted synthesis of NiP@CoAl-LDH nanotube arrays with superior electrochemical performance for supercapacitors, *Electrochim. Acta* **2016**, *204*, 160-168.
- [S22]Li, X.; Wu, H. J.; Elshahawy, A. M.; Wang, L.; Pennycook, S. J.; Guan, C.; Wang, J., Cactus-Like NiCoP/NiCo-OH 3D Architecture with Tunable Composition for High-Performance Electrochemical Capacitors, *Adv. Funct. Mater.* **2018**, *28* (20).
- [S23]Inamdar, A. I.; Chavan, H. S.; Kim, H.; Im, H., Mesoporous Ni-PANI composite electrode for electrochromic energy storage applications, *Sol. Energy Mater. Sol. Cells* **2019**, *201*.
- [S24]Gao, X. Y.; Zhao, Y. F.; Dai, K. Q.; Wang, J. T.; Zhang, B.; Shen, X. J., NiCoP nanowire@NiCo-layered double hydroxides nanosheet heterostructure for flexible asymmetric supercapacitors, *Chem. Eng. J.* **2020**, *384*.
- [S25]Lan, Y.; Zhao, H.; Zong, Y.; Li, X.; Sun, Y.; Feng, J.; Wang, Y.; Zheng, X.; Du, Y., Phosphorization boosts the capacitance of mixed metal nanosheet arrays for high performance supercapacitor electrodes, *Nanoscale* **2018**, *10* (25), 11775-11781.
- [S26]Wan, C. C.; Jiao, Y.; Bao, W. H.; Gao, H.; Wu, Y. Q.; Li, J., Self-stacked multilayer FeOCl supported on a cellulose-derived carbon aerogel: a new and high-performance anode material for supercapacitors, *J. Mater. Chem. A* **2019**, *7* (16), 9556-9564.

- [S27]Xu, L.; Xia, J.; Xu, H.; Yin, S.; Wang, K.; Huang, L.; Wang, L.; Li, H., Reactable ionic liquid assisted solvothermal synthesis of graphite-like C<sub>3</sub>N<sub>4</sub> hybridized  $\alpha$ -Fe<sub>2</sub>O<sub>3</sub> hollow microspheres with enhanced supercapacitive performance, *J. Power Sources* **2014**, *245*, 866-874.
- [S28]Zhao, J.; Li, Z. J.; Yuan, X. C.; Yang, Z.; Zhang, M.; Meng, A.; Li, Q. D., A High-Energy Density Asymmetric Supercapacitor Based on Fe<sub>2</sub>O<sub>3</sub> Nanoneedle Arrays and NiCo<sub>2</sub>O<sub>4</sub>/Ni(OH)<sub>2</sub> Hybrid Nanosheet Arrays Grown on SiC Nanowire Networks as Free-Standing Advanced Electrodes, *Adv. Energy Mater.* **2018**, *8* (12).
- [S29]Chen, D.; Zhou, S.; Quan, H.; Zou, R.; Gao, W.; Luo, X.; Guo, L., Tetsubo-like  $\alpha$ -Fe<sub>2</sub>O<sub>3</sub>/C nanoarrays on carbon cloth as negative electrode for high-performance asymmetric supercapacitors, *Chem. Eng. J.* **2018**, *341*, 102-111.
- [S30]Zhao, P. H.; Li, W. L.; Wang, G.; Yu, B. Z.; Li, X. J.; Bai, J. T.; Ren, Z. Y., Facile hydrothermal fabrication of nitrogen-doped graphene/Fe<sub>2</sub>O<sub>3</sub> composites as high performance electrode materials for supercapacitor, *J. Alloys Comp.* **2014**, *604*, 87-93.
- [S31]Gnana Sundara Raj, B.; Ko, T. H.; Acharya, J.; Seo, M.-K.; Khil, M.-S.; Kim, H.-Y.; Kim, B.-S., A novel Fe<sub>2</sub>O<sub>3</sub>-decorated N-doped CNT porous composites derived from tubular polypyrrole with excellent rate capability and cycle stability as advanced supercapacitor anode materials, *Electrochim. Acta* **2020**, *334*.
- [S32]Sajjad, M.; Lu, W., Regulating high specific capacitance NCS/ $\alpha$ -MnO<sub>2</sub> cathode and a wide potential window  $\alpha$ -Fe<sub>2</sub>O<sub>3</sub>/rGO anode for the construction of 2.7 V for high performance aqueous asymmetric supercapacitors, *J. Energy Storage* **2021**, *44*, 103343.
- [S33]Zhang, D.; Kong, X.; Zhang, F.; Lei, X., Electric-Field-Assisted Enhanced Electron Transfer to Boost Supercapacitor Negative Electrode Performance for a Fabricated Fe<sub>7</sub>S<sub>8</sub>/ $\alpha$ -FeOOH Nano-Heterostructure, *Adv. Electron. Mater.* **2020**, *6*, 1900953.
- [S34]Movassagh-Alanagh, F.; Bordbar-Khiabani, A.; Ahangari-Asl, A., Fabrication of a ternary PANI@Fe<sub>3</sub>O<sub>4</sub>@CFs nanocomposite as a high performance electrode for



- solid-state supercapacitors, *Int. J. Hydrogen Energy* **2019**, *44* (49), 26794-26806.
- [S35] Sun, Z. Q.; Yang, X.; Lin, H. M.; Zhang, F.; Wang, Q.; Qu, F. Y., Bifunctional iron disulfide nanoellipsoids for high energy density supercapacitor and electrocatalytic oxygen evolution applications, *Inorg. Chem. Front.* **2019**, *6* (3), 659-670.
- [S36] Zhu, M.; Chen, Q.; Tang, J.; Wei, W.; Li, S., Core@shell  $\beta$ -FeOOH@polypyrrolle derived N, S-codoped Fe<sub>3</sub>O<sub>4</sub>@N-doped porous carbon nanococoons for high performance supercapacitors, *Appl. Surf. Sci.* **2019**, *480*, 582-592.
- [S37] Wang, Y. D.; Shen, C.; Niu, L. Y.; Li, R. Z.; Guo, H. T.; Shi, Y. X.; Li, C.; Liu, X. J.; Gong, Y. Y., Hydrothermal synthesis of CuCo<sub>2</sub>O<sub>4</sub>/CuO nanowire arrays and RGO/Fe<sub>2</sub>O<sub>3</sub> composites for high-performance aqueous asymmetric supercapacitors, *J. Mater. Chem. A* **2016**, *4* (25), 9977-9985.
